# Supplementary material for: Umpolung coupling of pyridine-2-carboxaldehydes and propargylic carbonates via N-heterocyclic carbene/palladium synergetic catalysis
Source: Royal Society of Chemistry journal article supplement (doi:10.1039/d1cc01311d), 2021-01-01

## Supplementary Information

# Umpolung Coupling of Pyridine-2-carboxaldehydes and Propargylic Carbonates via N-Heterocyclic Carbene/Palladium Synergetic Catalysis

Weiyang Bi,<sup>a,b</sup> Yunhui Yang,<sup>a,b,c</sup> Song Ye<sup>a,b</sup> and Congyang Wang<sup>\*a,b,c</sup>

<sup>a</sup>Beijing National Laboratory for Molecular Sciences, CAS Key Laboratory of Molecular Recognition and Function, CAS Research/Education Center for Excellence in Molecular Sciences, Institute of Chemistry, Chinese Academy of Sciences, Beijing, 100190, China

<sup>b</sup>University of Chinese Academy of Sciences, Beijing 100049, China

<sup>c</sup>Physical Science Laboratory, Huairou National Comprehensive Science Center, Beijing 101400, China

Email: [wangcy@iccas.ac.cn](mailto:wangcy@iccas.ac.cn)

## Table of Contents

|                                                                                                                                                                      |     |
|----------------------------------------------------------------------------------------------------------------------------------------------------------------------|-----|
| 1. General Information.....                                                                                                                                          | S3  |
| 2. General Procedure for the Preparation of Propargylic Carbonates.....                                                                                              | S4  |
| 3. Optimization of Umpolung Coupling of Pyridine-2-carboxaldehydes and Propargylic Carbonates via N-Heterocyclic Carbene/Palladium Synergetic Catalysis.....         | S6  |
| 4. Experimental Details of Umpolung Coupling of Pyridine-2-carboxaldehydes and Propargylic Carbonates via N-Heterocyclic Carbene/Palladium Synergetic Catalysis..... | S9  |
| 5. References .....                                                                                                                                                  | S28 |
| 6. NMR Spectra.....                                                                                                                                                  | S29 |

## 1. General Information

Unless otherwise noted, all reactions were carried out in over-dried reaction vessels with Teflon screw caps under nitrogen. All the chemicals were purchased commercially, and used without further purification. Anhydrous THF were distilled from sodium-benzophenone prior to use. All the pyridine carboxaldehydes **1a-1j**, catalysts and ligands were obtained from chemical suppliers and used as received. Flash column chromatography was performed on silica gel (200 - 300 mesh) with the indicated solvent mixtures. TLC analysis was performed on pre-coated, glass-backed silica gel plates and visualized with UV light.

The  $^1\text{H}$  NMR,  $^{13}\text{C}$  NMR and  $^{19}\text{F}$  NMR spectra were recorded on a Bruker 400 AV or 500 AV spectrometers. Chemical shifts ( $\delta$ ) were reported as parts per million (ppm) downfield from tetramethylsilane and the following abbreviations were used to identify the multiplicities: s = singlet, d = doublet, t = triplet, q = quartet, m = multiplet and all combinations thereof can be explained by their integral parts. The high resolution mass spectra (HRMS) were recorded on a Thermo Scientific Exactive spectrometer or a Bruker APEX IV FTMS mass spectrometer.

## 2. General Procedure for the Preparation of Propargylic Carbonates

Propargylic carbonates **2a**, **2c**, **2j**, **2l**, **2m**, **2p** were prepared according to literature procedure<sup>1</sup>:

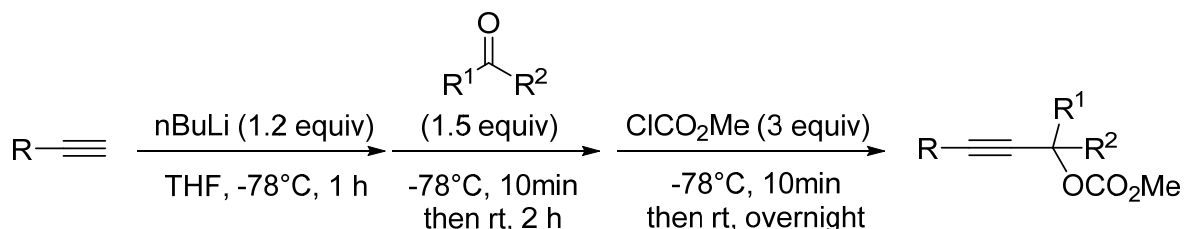

An oven-dried vial equipped with a magnetic stir bar was charged with alkyne (1 equiv.) in anhydrous THF (0.25 M) under nitrogen atmosphere. The solution was chilled to  $-78^\circ\text{C}$  and *n*-butyllithium (2.5 M in hexane, 1.2 equiv.) was added dropwise. After lithiation for 1 h at  $-78^\circ\text{C}$ , the solution was warmed to room temperature and stirred for 1 h. The solution was then chilled to  $-78^\circ\text{C}$ , ketone (1.5 equiv.) was added dropwise, and the solution was warmed to room temperature and stirred for 2 h. The solution was then cooled to  $-78^\circ\text{C}$ , methyl chloroformate (3 equiv.) was added dropwise, then the solution was warmed to room temperature and stirred overnight as monitored by TLC. The reaction mixture was quenched with saturated aqueous  $\text{NH}_4\text{Cl}$ . The reaction mixture was transferred to a separatory funnel, the organic layer was separated, and the aqueous layer was extracted with EtOAc. The combined organic phases were washed with brine, dried over  $\text{Na}_2\text{SO}_4$ , filtered, concentrated under reduced pressure, and purified by silica gel column chromatography to afford the product.

Propargylic carbonates **2b**, **2d-2g**, **2h**, **2i**, **2k**, **2n**, **2o** were prepared according to literature procedure<sup>2</sup>:

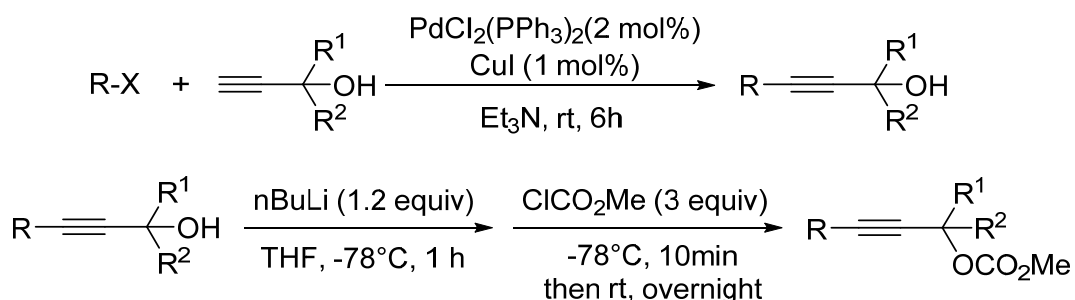

An oven-dried vial equipped with a magnetic stir bar was charged with copper(I) iodide (1 mol %), bis(triphenylphosphine)palladium(II) dichloride (2 mol %) and arylhalide (1.0 equiv.) in triethylamine (0.3 M) under nitrogen atmosphere. 2-methylbut-3-yn-2-ol (1.25 equiv.) was added

dropwise and the mixture was stirred at room temperature for 6 h. Upon completion as checked by TLC, the reaction mixture was quenched with saturated aqueous  $\text{NH}_4\text{Cl}$ . The reaction mixture was transferred to a separatory funnel, the organic layer was separated, and the aqueous layer was extracted with EtOAc. The combined organic phases were washed with brine, dried over  $\text{Na}_2\text{SO}_4$ , filtered, concentrated under reduced pressure, and purified by silica gel column chromatography to afford pure substituted propargylic alcohol product.

An oven-dried vial equipped with a magnetic stir bar was charged with propargylic alcohol (1 equiv.) in anhydrous THF (0.25 M) under nitrogen atmosphere. The solution was chilled to  $-78^\circ\text{C}$  and n-butyllithium (2.5 M in hexane, 1.2 equiv.) was added dropwise. After 1 h, methyl chloroformate (3 equiv.) was added dropwise at  $-78^\circ\text{C}$ , and the solution was stirred for 1 h at this temperature. Then the solution was warmed to room temperature and stirred overnight as monitored by TLC. The reaction mixture was quenched with saturated aqueous  $\text{NH}_4\text{Cl}$ . The reaction mixture was transferred to a separatory funnel, the organic layer was separated, and the aqueous layer was extracted with EtOAc. The combined organic phases were washed with brine, dried over  $\text{Na}_2\text{SO}_4$ , filtered, concentrated under reduced pressure, and purified by silica gel column chromatography to afford the product.

The analytical data of propargylic carbonates **2a-2p** are consistent with literatures<sup>1-9</sup>.

### 3. Optimization of Umpolung Coupling of Pyridine-2-carboxaldehydes and Propargylic Carbonates via N-Heterocyclic Carbene/Palladium Synergetic Catalysis

Table S1. Optimization of Pd catalysts<sup>a</sup>

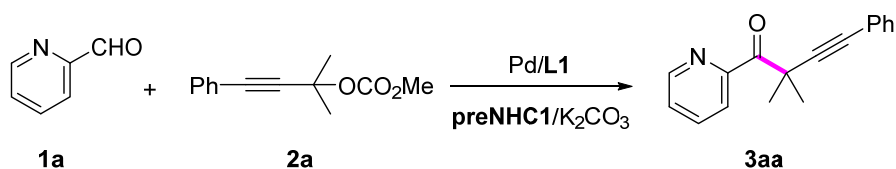

| Entry | Pd                                                  | Yield(%) <sup>b</sup> |
|-------|-----------------------------------------------------|-----------------------|
| 1     | Pd(dba) <sub>2</sub>                                | 34                    |
| 2     | Pd(TFA) <sub>2</sub>                                | 7                     |
| 3     | PdCl <sub>2</sub>                                   | 21                    |
| 4     | Pd(CH <sub>3</sub> CN) <sub>2</sub> Cl <sub>2</sub> | 15                    |
| 5     | Pd(acac) <sub>2</sub>                               | 28                    |
| 6     | Pd <sub>2</sub> (dba) <sub>3</sub>                  | 28                    |
| 7     | Pd(OAc) <sub>2</sub>                                | 6                     |
| 8     | Pd(PPh <sub>3</sub> ) <sub>4</sub>                  | 29                    |
| 9     | [Pd(π-allyl)Cl <sub>2</sub> ] <sub>2</sub>          | <1                    |

<sup>a</sup> Reaction conditions: **1a** (0.4 mmol, 2 equiv.), **2a** (0.2 mmol, 1 equiv.), Pd catalyst (0.02 mmol, 10 mol%), 1,2-bis(diphenylphosphino)ethane **L1** (0.02 mmol, 10 mol%), preNHC1 (0.04 mmol, 20 mol%), K<sub>2</sub>CO<sub>3</sub> (0.4 mmol, 2 equiv.), THF (3.0 mL), 80 °C for 12 h under N<sub>2</sub> atmosphere. <sup>b</sup> Yields determined by <sup>1</sup>H NMR analysis with 1,3,5-trimethoxybenzene as an internal standard.

**Table S2.** Optimization of ligands<sup>a, b</sup>

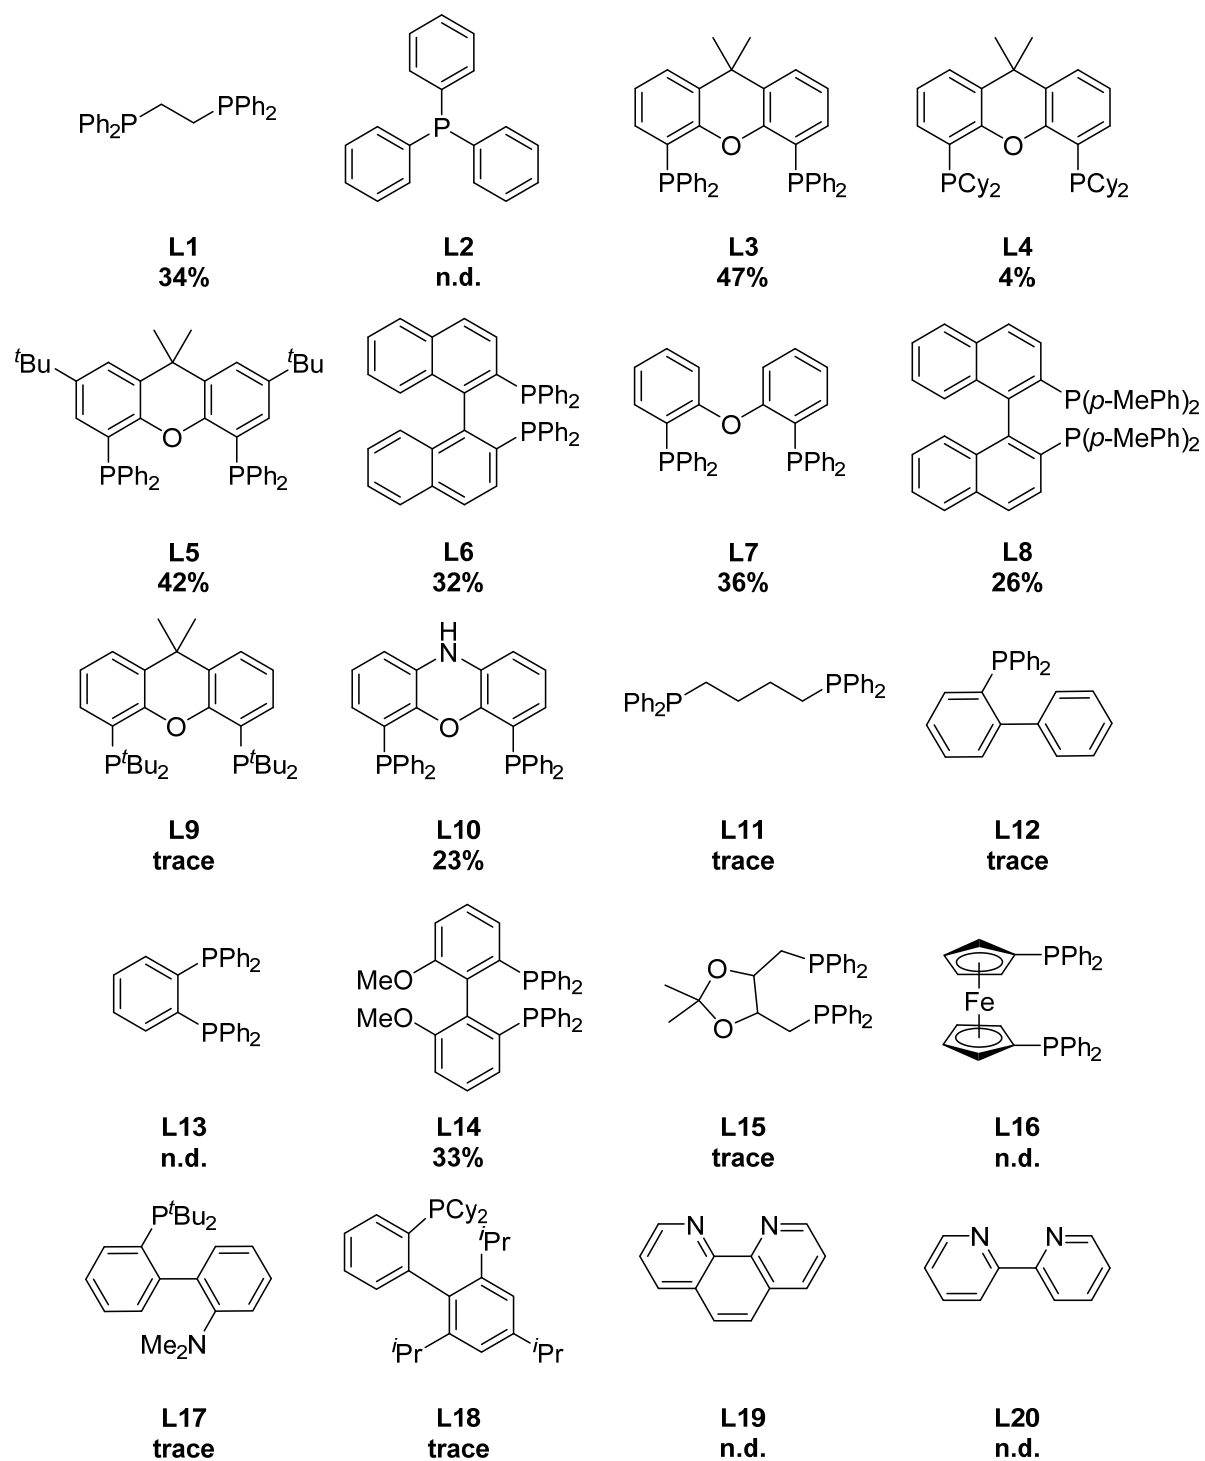

<sup>a</sup> Reaction conditions: **1a** (0.4 mmol, 2 equiv.), **2a** (0.2 mmol, 1 equiv.), Pd(dba)<sub>2</sub> (0.02 mmol, 10 mol%), ligand (0.02 mmol, 10 mol%), **preNHC2** (0.04 mmol, 20 mol%), K<sub>2</sub>CO<sub>3</sub> (0.4 mmol, 2

equiv.), THF (3.0 mL), 80 °C for 12 h under N<sub>2</sub> atmosphere. <sup>b</sup> Yields determined by <sup>1</sup>H NMR analysis with 1,3,5-trimethoxybenzene as an internal standard.

**Table S3.** Optimization of preNHCs<sup>a,b</sup>

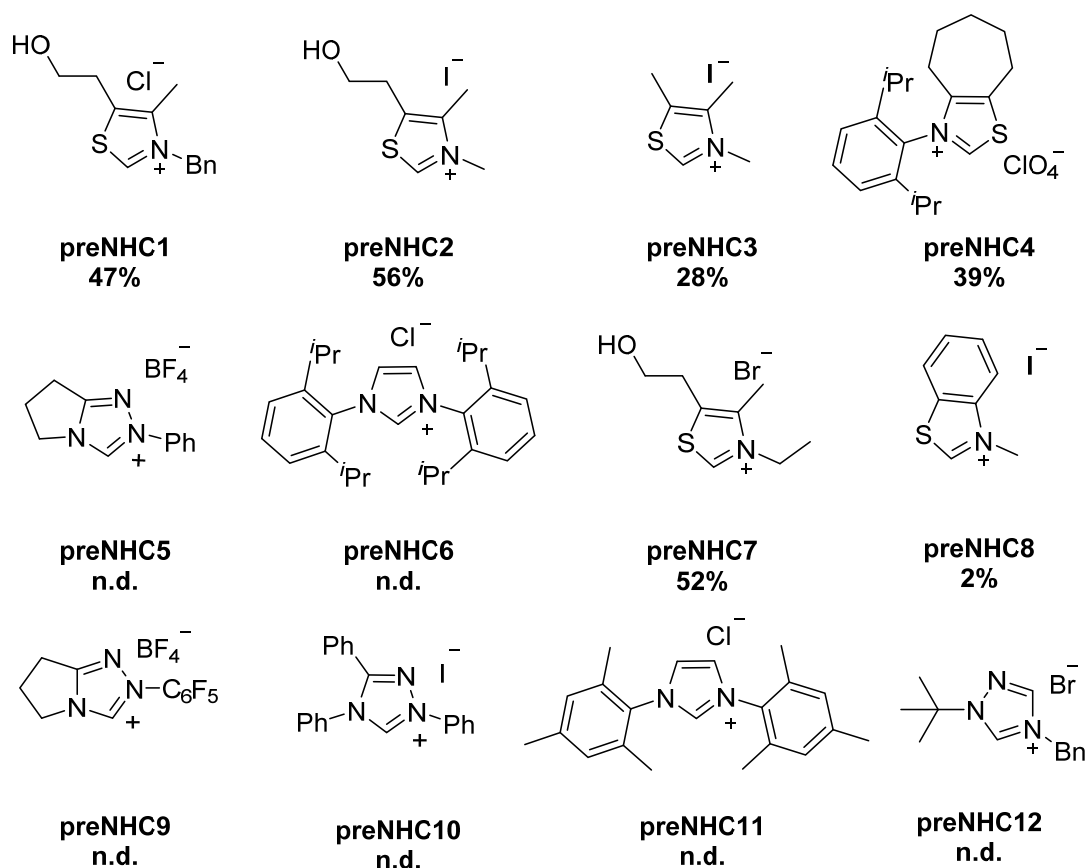

<sup>a</sup> Reaction conditions: **1a** (0.4 mmol, 2 equiv.), **2a** (0.2 mmol, 1 equiv.), Pd(dba)<sub>2</sub> (0.02 mmol, 10 mol%), **L3** (0.02 mmol, 10 mol%), preNHC (0.04 mmol, 20 mol%), K<sub>2</sub>CO<sub>3</sub> (0.4 mmol, 2 equiv.), THF (3.0 mL), 80 °C for 12 h under N<sub>2</sub> atmosphere. <sup>b</sup> Yields determined by <sup>1</sup>H NMR analysis with 1,3,5-trimethoxybenzene as an internal standard.



#### 4. Experimental Details of Umpolung Coupling of Pyridine-2-carboxaldehydes and Propargylic Carbonates via N-Heterocyclic Carbene/Palladium Synergetic Catalysis

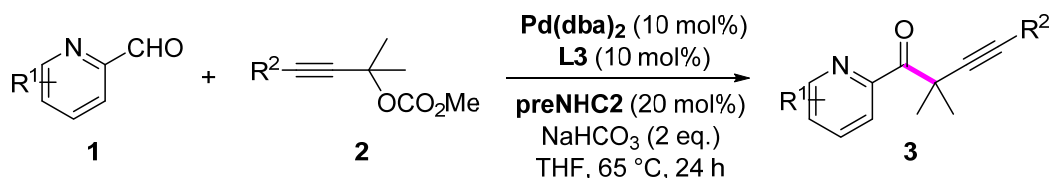

General procedure: To a 25 mL flame-dried Schlenk tube was added bis(dibenzylideneacetone)palladium [ $\text{Pd}(\text{dba})_2$ ] (0.05 mmol, 10.0 mol%, 28.8 mg), 4,5-Bis(diphenylphosphino)-9,9-dimethylxanthene (xantphos) **L3** (0.05 mmol, 10.0 mol%, 28.9 mg), 5-(2-Hydroxyethyl)-3,4-dimethylthiazolium iodide **preNHC2** (0.1 mmol, 20.0 mol%, 28.5 mg), sodium bicarbonate (1.0 mmol, 2 equiv., 84.0 mg) and THF (6 mL) sequentially under  $\text{N}_2$  atmosphere. Then the corresponding *o*-azaaryl carboxaldehyde (**1**) (1.0 mmol, 2 equiv.) and propargylic carbonate (**2**) (0.5 mmol, 1 equiv.) were added. The tube was sealed and stirred at 65°C for 24 h. After completion, the reaction mixture was diluted with ethyl acetate (5.0 mL) and filtered through a short pad silica gel washing with ethyl acetate (20 mL). The filtrate was concentrated and purified by silica gel column chromatography to provide the product **3**.

##### 2,2-dimethyl-4-phenyl-1-(pyridin-2-yl)but-3-yn-1-one (**3aa**)

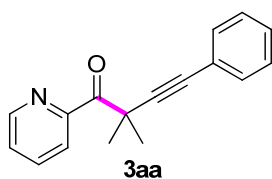

Prepared according to general procedure using pyridine-2-carboxaldehyde (**1a**) (107.0 mg, 1.0 mmol) and methyl (2-methyl-4-phenylbut-3-yn-2-yl) carbonate (**2a**) (109.0 mg, 0.5 mmol); flash column chromatography on silica gel (PE:EA = 50:1) provided **3aa** as a yellow oil (92.2 mg, 0.37 mmol, 74%).

$^1\text{H NMR}$  (400 MHz,  $\text{CDCl}_3$ )  $\delta$  8.72 (d,  $J = 5.2$  Hz, 1H), 8.02 (d,  $J = 7.6$  Hz, 1H), 7.81 (td,  $J = 8.0, 2.0$  Hz, 1H), 7.41 (ddd,  $J = 7.6, 4.8, 1.2$  Hz, 1H), 7.32 – 7.17 (m, 5H), 1.79 (s, 6H).

<sup>13</sup>C NMR (101 MHz, Chloroform-*d*) δ 199.9, 153.4, 148.3, 136.6, 131.6, 128.2, 127.8, 126.5, 123.9, 123.8, 93.6, 83.8, 42.9, 27.5.

HRMS (ESI): Calculated for C<sub>17</sub>H<sub>16</sub>ON<sup>+</sup> ([M+H]<sup>+</sup>): 250.12264, Found: 250.12257.

### 2,2-dimethyl-1-(6-methylpyridin-2-yl)-4-phenylbut-3-yn-1-one (3ba)

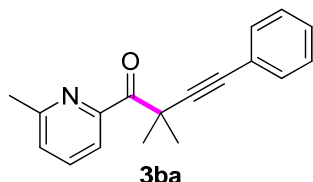

Prepared according to general procedure using 6-methylpicolinaldehyde (**1b**)(121.1 mg, 1.0 mmol) and methyl (2-methyl-4-phenylbut-3-yn-2-yl) carbonate (**2a**)(109.0 mg, 0.5 mmol); flash column chromatography on silica gel (PE:EA = 50:1) provided the **3ba** as a yellow oil (83.2 mg, 0.32 mmol, 63%).

<sup>1</sup>H NMR (500 MHz, Chloroform-*d*) δ 7.82 (d, *J* = 8.0 Hz, 1H), 7.67 (t, *J* = 8.0 Hz, 1H), 7.31 – 7.21 (m, 6H), 2.62 (s, 3H), 1.78 (s, 6H).

<sup>13</sup>C NMR (126 MHz, Chloroform-*d*) δ 200.1, 157.2, 152.7, 136.7, 131.5, 128.2, 127.8, 126.1, 124.0, 120.9, 94.0, 83.5, 42.9, 27.6, 24.6.

HRMS (ESI): Calculated for C<sub>18</sub>H<sub>18</sub>ON<sup>+</sup> ([M+H]<sup>+</sup>): 264.13829, Found: 284.13834.

### 1-(6-methoxypyridin-2-yl)-2,2-dimethyl-4-phenylbut-3-yn-1-one (3ca)

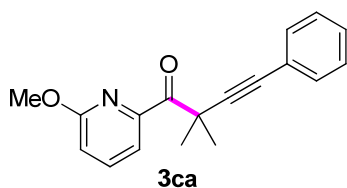

Prepared according to general procedure using 6-methoxypicolinaldehyde (**1c**) (137.1 mg, 1.0 mmol) and methyl (2-methyl-4-phenylbut-3-yn-2-yl) carbonate (**2a**) (109.0 mg, 0.5 mmol); flash column chromatography on silica gel (PE:EA = 30:1) provided the **3ca** as a yellow oil (88.1 mg, 0.32 mmol, 63%).

<sup>1</sup>H NMR (500 MHz, Chloroform-*d*) δ 7.73 – 7.60 (m, 2H), 7.32 – 7.19 (m, 5H), 6.91 (dd, *J* = 8.0, 1.0 Hz, 1H), 4.01 (d, *J* = 1.3 Hz, 3H), 1.77 (s, 6H).

**<sup>13</sup>C NMR (126 MHz, Chloroform-*d*)**  $\delta$  199.0, 162.4, 150.1, 139.1, 131.5, 128.3, 127.8, 124.0, 117.3, 115.1, 94.0, 83.1, 54.1, 42.5, 27.4.

**HRMS (ESI):** Calculated for C<sub>18</sub>H<sub>18</sub>O<sub>2</sub>N<sup>+</sup> ([M+H]<sup>+</sup>): 280.13321, Found: 280.13339.

### 1-(5-chloropyridin-2-yl)-2,2-dimethyl-4-phenylbut-3-yn-1-one (**3da**)

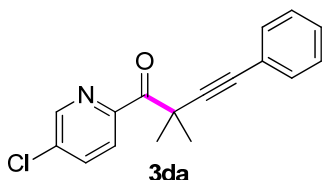

Prepared according to general procedure using 5-chloropicolinaldehyde (**1d**)(141.0 mg, 1.0 mmol) and methyl (2-methyl-4-phenylbut-3-yn-2-yl) carbonate (**2a**)(109.0 mg, 0.5 mmol); flash column chromatography on silica gel (PE:EA = 50:1) provided the **3da** as a yellow oil (101.9 mg, 0.36 mmol, 72%).

**<sup>1</sup>H NMR (400 MHz, Chloroform-*d*)**  $\delta$  8.66 (d, *J* = 2.0 Hz, 1H), 8.01 (d, *J* = 8.4 Hz, 1H), 7.80 (dd, *J* = 8.4, 2.4 Hz, 1H), 7.31 – 7.23 (m, 5H), 1.77 (s, 6H).

**<sup>13</sup>C NMR (101 MHz, Chloroform-*d*)**  $\delta$  198.6, 151.0, 147.2, 136.5, 135.4, 131.6, 128.3, 128.0, 125.1, 123.6, 93.2, 83.9, 42.7, 27.4.

**HRMS (ESI):** Calculated for C<sub>17</sub>H<sub>15</sub>ONCl<sup>+</sup> ([M+H]<sup>+</sup>): 284.08367, Found: 284.08389.

### 2,2-dimethyl-1-(5-methylpyridin-2-yl)-4-phenylbut-3-yn-1-one (**3ea**)

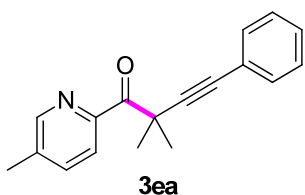

Prepared according to general procedure using 5-methylpicolinaldehyde (**1e**)(121.1 mg, 1.0 mmol) and methyl (2-methyl-4-phenylbut-3-yn-2-yl) carbonate (**2a**)(109.0 mg, 0.5 mmol); flash column chromatography on silica gel (PE:EA = 50:1) provided the **3ea** as a yellow oil (77.4 mg, 0.29 mmol, 59%).

**<sup>1</sup>H NMR (400 MHz, Chloroform-*d*)**  $\delta$  8.53 (s, 1H), 7.97 (d, *J* = 8.0 Hz, 1H), 7.59 (d, *J* = 7.6 Hz, 1H), 7.34 – 7.19 (m, 5H), 2.39 (s, 2H).

$^{13}\text{C}$  NMR (101 MHz, Chloroform-*d*)  $\delta$  199.4, 150.7, 148.8, 136.9, 136.9, 131.6, 128.2, 127.8, 123.9, 123.8, 93.8, 83.6, 42.7, 27.5, 18.9.

HRMS (ESI): Calculated for  $\text{C}_{18}\text{H}_{18}\text{ON}^+$  ( $[\text{M}+\text{H}]^+$ ): 264.13829, Found: 264.13864.

### 1-(4-chloropyridin-2-yl)-2,2-dimethyl-4-phenylbut-3-yn-1-one (3fa)

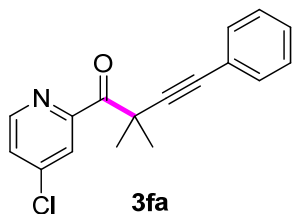

Prepared according to general procedure using 4-chloropicolinaldehyde (**1f**) (141.0 mg, 1.0 mmol) and methyl (2-methyl-4-phenylbut-3-yn-2-yl) carbonate (**2a**) (109.0 mg, 0.5 mmol); flash column chromatography on silica gel (PE:EA = 50:1) provided the **3fa** as a yellow oil (93.2 mg, 0.33 mmol, 66%).

$^1\text{H}$  NMR (400 MHz, Chloroform-*d*)  $\delta$  8.61 (d,  $J = 5.2$  Hz, 1H), 8.02 (d,  $J = 2.0$  Hz, 1H), 7.43 (dd,  $J = 5.2, 2.4$  Hz, 1H), 7.32 – 7.18 (m, 5H), 1.78 (s, 6H).

$^{13}\text{C}$  NMR (101 MHz, Chloroform-*d*)  $\delta$  198.7, 154.5, 149.2, 145.1, 131.6, 128.2, 128.0, 126.7, 124.4, 123.6, 93.1, 84.1, 42.9, 27.4.

HRMS (ESI): Calculated for  $\text{C}_{17}\text{H}_{15}\text{ONCl}^+$  ( $[\text{M}+\text{H}]^+$ ): 284.08367, Found: 284.08392.

### 1-(3-fluoropyridin-2-yl)-2,2-dimethyl-4-phenylbut-3-yn-1-one (3ga)

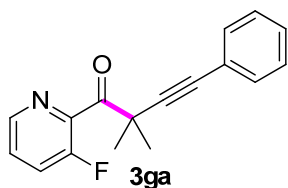

Prepared according to general procedure using 3-fluoropicolinaldehyde (**1g**) (125.1 mg, 1.0 mmol) and methyl (2-methyl-4-phenylbut-3-yn-2-yl) carbonate (**2a**) (109.0 mg, 0.5 mmol); flash column chromatography on silica gel (PE:EA = 50:1) provided the **3ga** as a yellow oil (67.8 mg, 0.25 mmol, 51%).

**<sup>1</sup>H NMR (500 MHz, Chloroform-*d*)** δ 8.47 (d, *J* = 4.0 Hz, 1H), 7.54 – 7.47 (m, 1H), 7.43 – 7.39 (m, 1H), 7.26 – 7.15 (m, 5H), 1.75 (s, 6H).

**<sup>19</sup>F NMR (377 MHz, Chloroform-*d*)** δ -121.8.

**<sup>13</sup>C NMR (126 MHz, Chloroform-*d*)** δ 200.1 (d, *J* = 4.5 Hz), 157.1(d, *J* = 266.1 Hz), 144.6 (d, *J* = 12.9 Hz), 144.2 (d, *J* = 5.0 Hz), 131.5, 128.2, 128.0, 126.8 (d, *J* = 4.3 Hz), 124.4 (d, *J* = 19.0 Hz), 123.3, 92.2, 84.3, 44.3, 27.2.

**HRMS (ESI):** Calculated for C<sub>17</sub>H<sub>15</sub>ONF<sup>+</sup> ([M+H]<sup>+</sup>): 268.11322, Found: 268.11340.

### 2,2-dimethyl-4-phenyl-1-(quinolin-2-yl)but-3-yn-1-one (3ha)

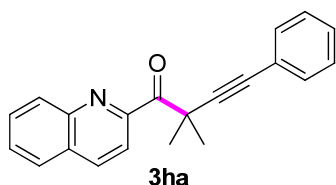

Prepared according to general procedure using quinoline-2-carbaldehyde (**1h**) (157.1 mg, 1.0 mmol) and methyl (2-methyl-4-phenylbut-3-yn-2-yl) carbonate (**2a**) (109.0 mg, 0.5 mmol); flash column chromatography on silica gel (PE:EA = 50:1) provided the **3ha** as a yellow oil (79.4 mg, 0.27 mmol, 53%).

**<sup>1</sup>H NMR (500 MHz, Chloroform-*d*)** δ 8.24 (t, *J* = 8.5 Hz, 2H), 8.09 (d, *J* = 8.5 Hz, 1H), 7.86 (d, *J* = 8.0 Hz, 1H), 7.77 (t, *J* = 8.0 Hz, 1H), 7.64 (t, *J* = 7.5 Hz, 1H), 1.89 (s, 6H).

**<sup>13</sup>C NMR (126 MHz, Chloroform-*d*)** δ 200.3, 152.5, 146.7, 136.6, 131.6, 130.8, 130.0, 129.2, 128.6, 128.2, 127.7, 127.7, 123.9, 120.1, 93.9, 83.6, 43.1, 27.8.

**HRMS (ESI):** Calculated for C<sub>21</sub>H<sub>18</sub>ON<sup>+</sup> ([M+H]<sup>+</sup>): 300.13829, Found: 300.13843.

### 4-(4-fluorophenyl)-2,2-dimethyl-1-(pyridin-2-yl)but-3-yn-1-one (3ab)

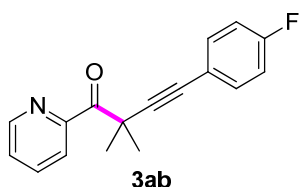

Prepared according to general procedure using pyridine-2-carboxaldehyde (**1a**) (107.0 mg, 1.0 mmol) and 4-(4-fluorophenyl)-2-methylbut-3-yn-2-yl methyl carbonate (**2b**) (118.0 mg, 0.5

mmol); flash column chromatography on silica gel (PE:EA = 50:1) provided the **3ab** as a yellow oil (93.4 mg, 0.35 mmol, 70%).

**<sup>1</sup>H NMR (400 MHz, Chloroform-*d*)**  $\delta$  8.71 (d,  $J = 4.0$  Hz, 1H), 8.02 (d,  $J = 7.6$  Hz, 1H), 7.82 (t,  $J = 7.6$  Hz, 1H), 7.49 – 7.38 (m, 1H), 7.32 – 7.18 (m, 2H), 6.92 (t,  $J = 8.8$  Hz, 2H), 1.78 (s, 6H).

**<sup>19</sup>F NMR (377 MHz, Chloroform-*d*)**  $\delta$  -112.0.

**<sup>13</sup>C NMR (101 MHz, Chloroform-*d*)**  $\delta$  199.7, 162.3 (d,  $J = 249.4$  Hz), 161.1, 153.3, 148.2, 136.7, 133.4 (d,  $J = 8.3$  Hz), 126.6, 124.0, 119.9, 115.4 (d,  $J = 22.1$  Hz), 93.3, 82.7, 42.8, 27.4.

**HRMS (ESI):** Calculated for C<sub>17</sub>H<sub>15</sub>ONF<sup>+</sup> ([M+H]<sup>+</sup>): 268.11322, Found: 268.11322.

#### 4-(4-chlorophenyl)-2,2-dimethyl-1-(pyridin-2-yl)but-3-yn-1-one (**3ac**)

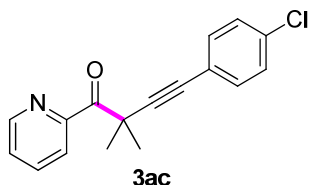

Prepared according to general procedure using pyridine-2-carboxaldehyde (**1a**) (107.0 mg, 1.0 mmol) and 4-(4-chlorophenyl)-2-methylbut-3-yn-2-yl methyl carbonate (**2c**) (126.0 mg, 0.5 mmol); flash column chromatography on silica gel (PE:EA = 50:1) provided the **3ac** as a yellow oil (86.2 mg, 0.30 mmol, 61%).

**<sup>1</sup>H NMR (400 MHz, Chloroform-*d*)**  $\delta$  8.71 (s, 1H), 8.02 (d,  $J = 7.6$  Hz, 1H), 7.82 (t,  $J = 7.6$  Hz, 1H), 7.50 – 7.39 (m, 1H), 7.20 (s, 4H), 1.78 (s, 6H).

**<sup>13</sup>C NMR (101 MHz, Chloroform-*d*)**  $\delta$  199.6, 153.2, 148.2, 136.7, 133.8, 132.8, 128.5, 126.6, 124.0, 122.3, 94.7, 82.7, 42.9, 27.4.

**HRMS (ESI):** Calculated for C<sub>17</sub>H<sub>15</sub>ONCl<sup>+</sup> ([M+H]<sup>+</sup>): 284.08367, Found: 284.08371.

#### 2,2-dimethyl-1-(pyridin-2-yl)-4-(4-(trifluoromethyl)phenyl)but-3-yn-1-one (**3ad**)

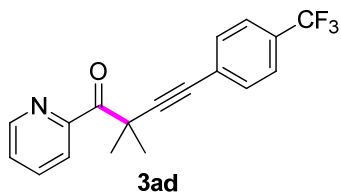

Prepared according to general procedure using pyridine-2-carboxaldehyde (**1a**)(107.0 mg, 1.0 mmol) and methyl (2-methyl-4-(4-(trifluoromethyl)phenyl)but-3-yn-2-yl) carbonate (**2d**)(143.0 mg, 0.5 mmol); flash column chromatography on silica gel (PE:EA = 50:1) provided the **3ad** as a yellow oil (95.5 mg, 0.30 mmol, 60%).

**<sup>1</sup>H NMR (400 MHz, Chloroform-*d*)**  $\delta$  8.71 (d,  $J$  = 4.4 Hz, 1H), 8.03 (d,  $J$  = 7.6 Hz, 1H), 7.83 (td,  $J$  = 8.0, 1.6 Hz, 1H), 7.52 – 7.41 (m, 3H), 7.37 (d,  $J$  = 8.0 Hz, 2H), 1.80 (s, 6H).

**<sup>19</sup>F NMR (377 MHz, Chloroform-*d*)**  $\delta$  -62.8.

**<sup>13</sup>C NMR (101 MHz, Chloroform-*d*)**  $\delta$  199.4, 153.1, 148.2, 136.8, 131.8, 127.7, 126.7, 125.5, 125.1 (q,  $J$  = 3.7 Hz), 124.0, 96.4, 82.6, 42.9, 27.3.

**HRMS (ESI):** Calculated for C<sub>18</sub>H<sub>15</sub>ONF<sub>3</sub><sup>+</sup> ([M+H]<sup>+</sup>): 318.11003, Found: 318.10989.

**methyl 4-(3,3-dimethyl-4-oxo-4-(pyridin-2-yl)but-1-yn-1-yl)benzoate (**3ae**)**

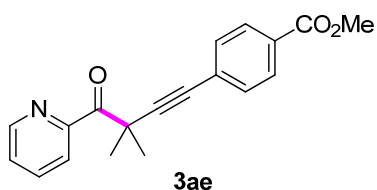

Prepared according to general procedure using pyridine-2-carboxaldehyde (**1a**)(107.0 mg, 1.0 mmol) and methyl 4-(3-((methoxycarbonyl)oxy)-3-methylbut-1-yn-1-yl)benzoate (**2e**)(138.1 mg, 0.5 mmol); flash column chromatography on silica gel (PE:EA = 10:1) provided the **3ae** as a yellow oil (69.1 mg, 0.22 mmol, 44%).

**<sup>1</sup>H NMR (400 MHz, Chloroform-*d*)**  $\delta$  8.71 (d,  $J$  = 4.4 Hz, 1H), 8.03 (d,  $J$  = 7.6 Hz, 1H), 7.90 (d,  $J$  = 8.4 Hz, 2H), 7.83 (td,  $J$  = 7.6, 1.6 Hz, 1H), 7.45 – 7.42 (m, 1H), 7.33 (d,  $J$  = 8.4 Hz, 2H), 3.89 (s, 3H), 1.80 (s, 6H).

**<sup>13</sup>C NMR (101 MHz, Chloroform-*d*)**  $\delta$  199.4, 166.7, 153.1, 148.2, 136.8, 131.5, 129.4, 129.2, 128.6, 126.7, 124.0, 97.0, 83.2, 52.3, 42.9, 27.3.

**HRMS (ESI):** Calculated for C<sub>19</sub>H<sub>18</sub>O<sub>3</sub>N<sup>+</sup> ([M+H]<sup>+</sup>): 308.12812, Found: 308.12817.

**2,2-dimethyl-1-(pyridin-2-yl)-4-(p-tolyl)but-3-yn-1-one (**3af**)**

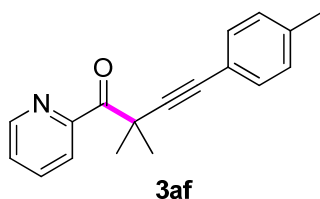

Prepared according to general procedure using pyridine-2-carboxaldehyde (**1a**)(107.0 mg, 1.0 mmol) and methyl (2-methyl-4-(p-tolyl)but-3-yn-2-yl) carbonate (**2f**)(116.1 mg, 0.5 mmol); flash column chromatography on silica gel (PE:EA = 50:1) provided the **3af** as a yellow oil (86.9 mg, 0.33 mmol, 66%).

**<sup>1</sup>H NMR (400 MHz, Chloroform-*d*)** <sup>1</sup>H NMR (400 MHz, Chloroform-*d*) δ 8.70 (d, *J* = 4.4 Hz, 1H), 8.02 (d, *J* = 8.0 Hz, 1H), 7.79 (t, *J* = 8.0 Hz, 1H), 7.44 – 7.35 (m, 1H), 7.17 (d, *J* = 8.0 Hz, 2H), 7.02 (d, *J* = 7.6 Hz, 2H), 2.29 (s, 3H), 1.78 (s, 6H).

**<sup>13</sup>C NMR (101 MHz, Chloroform-*d*)** δ 199.9, 153.4, 148.2, 137.8, 136.6, 131.4, 128.9, 126.4, 123.9, 120.7, 92.8, 83.9, 42.8, 27.5, 21.5.

**HRMS (ESI):** Calculated for C<sub>18</sub>H<sub>18</sub>ON<sup>+</sup> ([M+H]<sup>+</sup>): 264.13829, Found: 264.13849.

#### 4-(4-(tert-butyl)phenyl)-2,2-dimethyl-1-(pyridin-2-yl)but-3-yn-1-one (**3ag**)

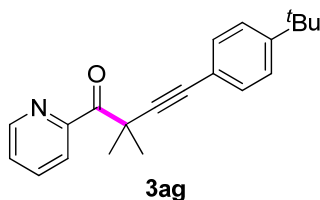

Prepared according to general procedure using pyridine-2-carboxaldehyde (**1a**)(107.0 mg, 1.0 mmol) and 4-(4-(tert-butyl)phenyl)-2-methylbut-3-yn-2-yl methyl carbonate (**2g**)(137.1 mg, 0.5 mmol); flash column chromatography on silica gel (PE:EA = 50:1) provided the **3ag** as a yellow oil (88.0 mg, 0.29 mmol, 58%).

**<sup>1</sup>H NMR (400 MHz, Chloroform-*d*)** δ 8.71 (d, *J* = 4.4 Hz, 1H), 8.02 (d, *J* = 7.6 Hz, 1H), 7.80 (td, *J* = 8.0, 2.0 Hz, 1H), 7.40 (dd, *J* = 7.6, 4.8 Hz, 1H), 7.26 – 7.20 (m, 4H), 1.78 (s, 6H), 1.26 (s, 9H).

**<sup>13</sup>C NMR (101 MHz, Chloroform-*d*)** δ 200.0, 153.4, 151.0, 148.3, 136.6, 131.3, 126.4, 125.2, 123.9, 120.7, 92.9, 83.9, 42.8, 34.8, 31.3, 27.5.



**HRMS (ESI):** Calculated for  $C_{21}H_{24}ON^+$  ( $[M+H]^+$ ): 306.18524, Found: 306.18539.

**4-(4-methoxyphenyl)-2,2-dimethyl-1-(pyridin-2-yl)but-3-yn-1-one (3ah)**

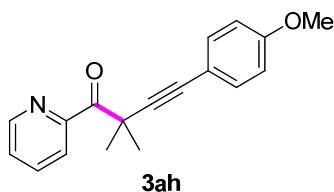

Prepared according to general procedure using pyridine-2-carboxaldehyde (**1a**)(107.0 mg, 1.0 mmol) and 4-(4-methoxyphenyl)-2-methylbut-3-yn-2-yl methyl carbonate (**2h**)(124.1 mg, 0.5 mmol); flash column chromatography on silica gel (PE:EA = 30:1) provided the **3ah** as a yellow oil( 98.8 mg, 0.36 mmol, 72%).

**$^1H$  NMR (400 MHz, Chloroform-*d*)**  $\delta$  8.72 (d,  $J$  = 4.0 Hz, 1H), 8.03 (d,  $J$  = 7.6 Hz, 1H), 7.81 (t,  $J$  = 7.6 Hz, 1H), 7.48 – 7.34 (m, 1H), 7.21 (d,  $J$  = 8.8 Hz, 2H), 6.76 (d,  $J$  = 8.8 Hz, 2H), 3.77 (s, 3H), 1.78 (s, 6H).

**$^{13}C$  NMR (101 MHz, Chloroform-*d*)**  $\delta$  200.0, 159.3, 153.5, 148.3, 136.6, 133.0, 126.4, 124.0, 116.0, 113.8, 92.0, 83.6, 55.4, 42.8, 27.5.

**HRMS (ESI):** Calculated for  $C_{18}H_{18}O_2N^+$  ( $[M+H]^+$ ): 280.13321, Found: 280.13348.

**4-(3-chlorophenyl)-2,2-dimethyl-1-(pyridin-2-yl)but-3-yn-1-one (3ai)**

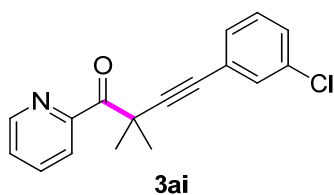

Prepared according to general procedure using pyridine-2-carboxaldehyde (**1a**)(107.0 mg, 1.0 mmol) and 4-(3-chlorophenyl)-2-methylbut-3-yn-2-yl methyl carbonate (**2i**)(126.0 mg, 0.5 mmol); flash column chromatography on silica gel (PE:EA = 50:1) provided the **3ai** as a yellow oil(75.1 mg, 0.27 mmol, 53%).

**$^1H$  NMR (500 MHz, Chloroform-*d*)**  $\delta$  8.72 (d,  $J$  = 4.0 Hz, 1H), 8.02 (d,  $J$  = 8.0 Hz, 1H), 7.83 (t,  $J$  = 8.0 Hz, 1H), 7.50 – 7.40 (m, 1H), 7.27 (s, 1H), 7.24 – 7.11 (m, 3H), 1.78 (s, 6H).

**<sup>13</sup>C NMR (126 MHz, Chloroform-*d*)** δ 199.5, 153.1, 148.3, 136.7, 134.0, 131.5, 129.7, 129.4, 128.1, 126.7, 125.5, 124.0, 95.0, 82.4, 42.8, 27.4.

**HRMS (ESI):** Calculated for C<sub>17</sub>H<sub>15</sub>ONCl<sup>+</sup> ([M+H]<sup>+</sup>): 284.08367, Found: 284.08380.

**4-(2-methoxyphenyl)-2,2-dimethyl-1-(pyridin-2-yl)but-3-yn-1-one (3aj)**

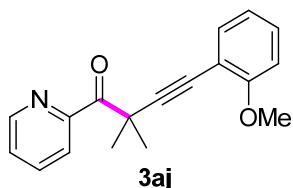

Prepared according to general procedure using pyridine-2-carboxaldehyde (**1a**)(107.0 mg, 1.0 mmol) and 4-(2-methoxyphenyl)-2-methylbut-3-yn-2-yl methyl carbonate (**2j**)(124.1 mg, 0.5 mmol); flash column chromatography on silica gel (PE:EA = 30:1) provided the **3aa** as a yellow oil(102.0 mg, 0.37 mmol, 73%).

**<sup>1</sup>H NMR (400 MHz, Chloroform-*d*)** δ 8.73 (s, 1H), 8.09 (s, 1H), 7.80 (s, 1H), 7.42 (s, 1H), 7.31 – 7.14 (m, 2H), 6.90 – 6.71 (m, 2H), 3.74 (s, 3H), 1.81 (s, 6H).

**<sup>13</sup>C NMR (101 MHz, Chloroform-*d*)** δ 200.0, 160.1, 153.6, 148.4, 136.6, 133.6, 129.3, 126.3, 124.1, 120.4, 113.0, 110.9, 97.5, 80.2, 55.9, 43.2, 27.5.

**HRMS (ESI):** Calculated for C<sub>18</sub>H<sub>18</sub>O<sub>2</sub>N<sup>+</sup> ([M+H]<sup>+</sup>): 280.13321, Found: 280.13339.

**2,2-dimethyl-4-(naphthalen-2-yl)-1-(pyridin-2-yl)but-3-yn-1-one (3ak)**

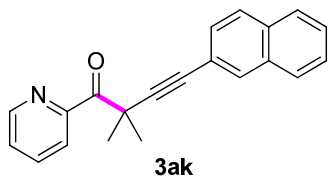

Prepared according to general procedure using pyridine-2-carboxaldehyde (**1a**)(107.0 mg, 1.0 mmol) and methyl (2-methyl-4-(naphthalen-2-yl)but-3-yn-2-yl) carbonate (**2k**)(134.1 mg, 0.5 mmol); flash column chromatography on silica gel (PE:EA = 50:1) provided the **3ak** as a yellow oil (88.2 mg, 0.29 mmol, 59%).

**<sup>1</sup>H NMR (500 MHz, Chloroform-*d*)** δ 8.74 (d, *J* = 4.0 Hz, 1H), 8.06 (d, *J* = 8.0 Hz, 1H), 7.83 – 7.67 (m, 5H), 7.45 – 7.40 (m, 3H), 7.33 (dt, *J* = 8.5, 2.0 Hz, 1H), 1.84 (s, 6H).

**<sup>13</sup>C NMR (126 MHz, Chloroform-*d*)** δ 199.8, 153.3, 148.3, 136.7, 133.0, 132.6, 131.2, 128.7, 127.8, 126.5, 124.0, 121.1, 94.0, 84.1, 42.9, 27.5.

**HRMS (ESI):** Calculated for C<sub>21</sub>H<sub>18</sub>ON<sup>+</sup> ([M+H]<sup>+</sup>): 300.13829, Found: 300.13855.

### 2,2-dimethyl-1-(pyridin-2-yl)-4-(thiophen-2-yl)but-3-yn-1-one (**3al**)

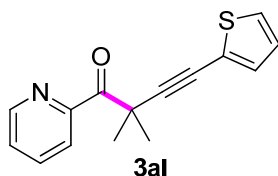

Prepared according to general procedure using pyridine-2-carboxaldehyde (**1a**) (107.0 mg, 1.0 mmol) and methyl (2-methyl-4-(thiophen-2-yl)but-3-yn-2-yl) carbonate (**2l**) (112.0 mg, 0.5 mmol); flash column chromatography on silica gel (PE:EA = 50:1) provided the **3al** as a yellow oil (77.7 mg, 0.30 mmol, 61%).

**<sup>1</sup>H NMR (400 MHz, Chloroform-*d*)** δ 8.73 (d, *J* = 4.0 Hz, 1H), 8.03 (d, *J* = 8.0 Hz, 1H), 7.83 (t, *J* = 7.6 Hz, 1H), 7.50 – 7.40 (m, 1H), 7.15 (d, *J* = 5.2 Hz, 1H), 7.04 (d, *J* = 3.6 Hz, 1H), 6.93 – 6.84 (m, 1H), 1.78 (s, 6H).

**<sup>13</sup>C NMR (101 MHz, Chloroform-*d*)** δ 199.4, 153.1, 148.2, 136.8, 131.3, 126.8, 126.6, 126.5, 124.0, 97.5, 43.0, 27.3.

**HRMS (ESI):** Calculated for C<sub>15</sub>H<sub>14</sub>ONS<sup>+</sup> ([M+H]<sup>+</sup>): 256.07906, Found: 256.07925.

### 2,2-dimethyl-1-(pyridin-2-yl)oct-3-yn-1-one (**3am**)

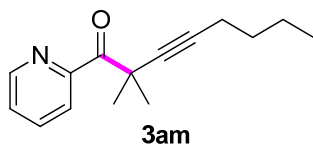

Prepared according to general procedure using pyridine-2-carboxaldehyde (**1a**) (107.0 mg, 1.0 mmol) and methyl (2-methyloct-3-yn-2-yl) carbonate (**2m**) (99.1 mg, 0.5 mmol); flash column chromatography on silica gel (PE:EA = 50:1) provided the **3am** as a yellow oil (47.0 mg, 0.21 mmol, 41%).

$^1\text{H}$  NMR (500 MHz, Chloroform-*d*)  $\delta$  8.74 – 8.65 (m, 1H), 7.98 (d,  $J$  = 8.0 Hz, 1H), 7.85 – 7.69 (m, 1H), 7.42 – 7.37 (m, 1H), 2.10 (td,  $J$  = 7.0, 2.5 Hz, 2H), 1.68 (s, 6H), 1.39 – 1.29 (m, 2H), 1.29 – 1.16 (m, 2H), 0.79 (td,  $J$  = 7.0, 2.5 Hz, 3H).

$^{13}\text{C}$  NMR (126 MHz, Chloroform-*d*)  $\delta$  200.6, 153.8, 148.2, 136.5, 126.2, 123.9, 84.2, 84.0, 42.4, 30.9, 27.7, 21.8, 18.7, 13.7.

HRMS (ESI): Calculated for  $\text{C}_{15}\text{H}_{20}\text{ON}^+$  ( $[\text{M}+\text{H}]^+$ ): 230.15394, Found: 230.15425.

### 2,2-dimethyl-4-(naphthalen-2-yl)-1-(quinolin-2-yl)but-3-yn-1-one (3hk)

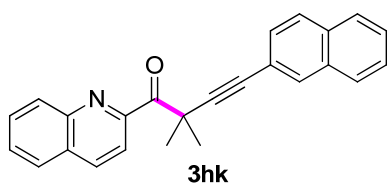

Prepared according to general procedure using quinoline-2-carbaldehyde (**1h**) (157.1 mg, 1.0 mmol) and methyl (2-methyl-4-(naphthalen-2-yl)but-3-yn-2-yl) carbonate (**2k**) (134.1 mg, 0.5 mmol); flash column chromatography on silica gel (PE:EA = 50:1) provided the **3hk** as a yellow solid (134.4 mg, 0.38 mmol, 77%).

$^1\text{H}$  NMR (400 MHz, Chloroform-*d*)  $\delta$  8.28 (t,  $J$  = 8.0 Hz, 2H), 8.11 (d,  $J$  = 8.8 Hz, 1H), 7.86 (d,  $J$  = 8.4 Hz, 1H), 7.82 – 7.70 (m, 3H), 7.67 – 7.60 (m, 3H), 7.41 (dd,  $J$  = 5.6, 3.6 Hz, 2H), 7.30 (d,  $J$  = 8.4 Hz, 1H), 1.92 (s, 6H).

$^{13}\text{C}$  NMR (101 MHz, Chloroform-*d*)  $\delta$  200.2, 152.6, 146.7, 136.8, 133.1, 132.6, 131.2, 130.8, 130.1, 129.2, 128.7, 128.6, 127.8, 127.7, 127.7, 126.4, 126.4, 121.2, 120.1, 94.3, 84.1, 43.3, 27.8.

HRMS (ESI): Calculated for  $\text{C}_{25}\text{H}_{20}\text{ON}$  ( $[\text{M}+\text{H}]^+$ ): 350.15394, Found: 350.15396.

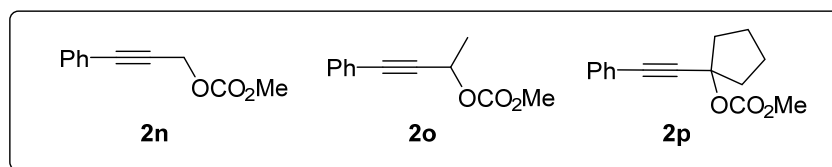

**Scheme S1** Unsuccessful substrates

### X-ray Structure and Data of Compound **3hk**

The crystal suitable for X-ray analysis was prepared by slow evaporation of the solvent of the solution of **3hk** in petroleum ether/CH<sub>2</sub>Cl<sub>2</sub> at 4°C. The absolute structure of **3hk** was determined with the Flack parameter of 0.001.

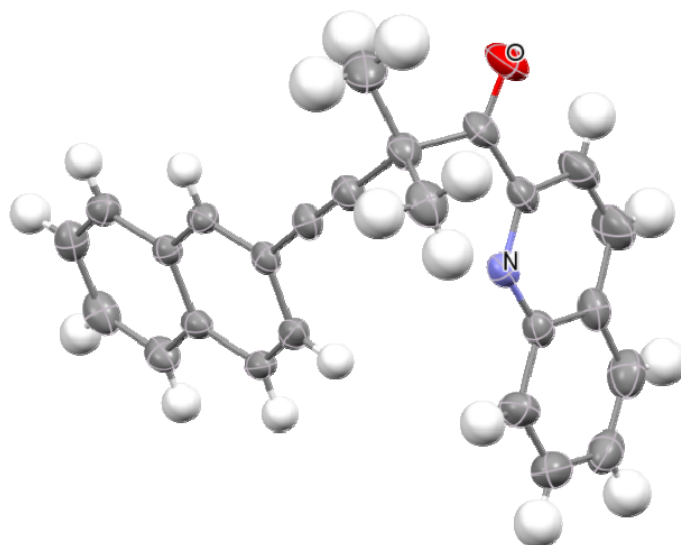

**Scheme S2** X-ray Crystal Structure of **3hk**

**Table S4** Crystal data and structure refinement for **3hk**.

|                     |                                    |
|---------------------|------------------------------------|
| Identification code | MX8850                             |
| Empirical formula   | C <sub>25</sub> H <sub>19</sub> NO |
| Formula weight      | 349.41                             |
| Temperature/K       | 170.00(10)                         |
| Crystal system      | tetragonal                         |
| Space group         | P42/n                              |
| a/Å                 | 21.9496(3)                         |
| b/Å                 | 21.9496(3)                         |
| c/Å                 | 7.9389(2)                          |

$\alpha/^\circ$  90  
 $\beta/^\circ$  90  
 $\gamma/^\circ$  90  
 Volume/ $\text{\AA}^3$  3824.84(14)  
 Z 8  
 $\rho_{\text{calc}}/\text{cm}^3$  1.214  
 $\mu/\text{mm}^{-1}$  0.074  
 F(000) 1472.0  
 Crystal size/ $\text{mm}^3$   $0.41 \times 0.32 \times 0.28$   
 Radiation  $\text{MoK}\alpha$  ( $\lambda = 0.71073$ )  
 $2\Theta$  range for data collection/ $^\circ$  3.712 to 61.286  
 Index ranges  $-22 \leq h \leq 31, -30 \leq k \leq 22, -10 \leq l \leq 10$   
 Reflections collected 31950  
 Independent reflections 5346 [Rint = 0.0176, Rsigma = 0.0136]  
 Data/restraints/parameters 5346/0/246  
 Goodness-of-fit on F2 1.038  
 Final R indexes [ $I \geq 2\sigma(I)$ ] R1 = 0.0438, wR2 = 0.1135  
 Final R indexes [all data] R1 = 0.0533, wR2 = 0.1189  
 Largest diff. peak/hole /  $e \text{\AA}^{-3}$  0.22/-0.17

**Table S5** Fractional Atomic Coordinates ( $\times 10^4$ ) and Equivalent Isotropic Displacement Parameters ( $\text{\AA}^2 \times 10^3$ ) for **3hk**.

Ueq is defined as 1/3 of the trace of the orthogonalised UIJ tensor.

| Atom | x | y | z | U(eq) |
|------|---|---|---|-------|
|------|---|---|---|-------|

|     |           |           |             |           |
|-----|-----------|-----------|-------------|-----------|
| O1  | 4148.2(5) | 6718.8(4) | 6845.5(18)  | 78.9(4)   |
| N1  | 4183.2(4) | 5193.1(4) | 8070.8(11)  | 38.6(2)   |
| C1  | 2970.4(4) | 4706.6(4) | 4238.9(12)  | 31.42(19) |
| C2  | 2714.7(4) | 4786.1(4) | 2676.1(12)  | 31.23(19) |
| C3  | 2732.9(4) | 4316.5(4) | 1459.8(12)  | 29.28(18) |
| C4  | 2479.7(4) | 4392.4(5) | -165.4(13)  | 36.2(2)   |
| C5  | 2518.9(5) | 3937.3(5) | -1329.2(14) | 43.1(2)   |
| C6  | 2809.7(5) | 3388.3(5) | -922.4(15)  | 46.0(3)   |
| C7  | 3051.4(5) | 3296.6(5) | 630.1(15)   | 40.8(2)   |
| C8  | 3019.7(4) | 3757.9(4) | 1870.4(12)  | 31.15(19) |
| C9  | 3269.1(4) | 3683.1(4) | 3503.6(14)  | 35.3(2)   |
| C10 | 3244.2(4) | 4140.1(4) | 4656.1(13)  | 34.6(2)   |
| C11 | 3004.1(4) | 5202.5(5) | 5408.8(13)  | 36.7(2)   |
| C12 | 3092.8(4) | 5605.5(5) | 6382.6(14)  | 39.0(2)   |
| C13 | 3261.3(5) | 6125.4(5) | 7456.8(16)  | 43.8(3)   |
| C14 | 2922.6(7) | 6695.4(6) | 6861(2)     | 66.5(4)   |
| C15 | 3119.0(6) | 6004.8(6) | 9321.9(17)  | 55.5(3)   |
| C16 | 3954.4(5) | 6221.6(5) | 7212.1(16)  | 47.2(3)   |
| C17 | 4385.9(5) | 5695.4(5) | 7371.8(14)  | 39.9(2)   |
| C18 | 4982.7(6) | 5759.1(6) | 6737(2)     | 59.1(3)   |
| C19 | 5361.9(6) | 5276.1(7) | 6810(2)     | 67.4(4)   |
| C20 | 5166.8(5) | 4725.7(6) | 7532.1(15)  | 46.1(3)   |
| C21 | 4568.2(5) | 4709.1(5) | 8172.8(13)  | 37.8(2)   |
| C22 | 4356.2(6) | 4170.0(6) | 8929.4(18)  | 54.3(3)   |

|     |           |           |            |         |
|-----|-----------|-----------|------------|---------|
| C23 | 4723.6(7) | 3671.3(6) | 9020(2)    | 62.4(4) |
| C24 | 5313.2(7) | 3681.6(6) | 8364.2(19) | 60.9(4) |
| C25 | 5531.2(6) | 4195.6(7) | 7640(2)    | 61.7(4) |

**Table S6** Anisotropic Displacement Parameters ( $\text{\AA}^2 \times 10^3$ ) for **3hk**.

The Anisotropic displacement factor exponent takes the form:  $-2\pi^2[h^2a^2U_{11}+2hka^*b^*U_{12}+\dots]$ .

| Atom | U11     | U22     | U33       | U23      | U13      | U12      |
|------|---------|---------|-----------|----------|----------|----------|
| O1   | 65.3(6) | 37.9(5) | 133.6(11) | 11.4(5)  | -13.7(6) | -19.7(4) |
| N1   | 36.2(4) | 38.4(4) | 41.4(5)   | -0.5(4)  | 1.0(3)   | -7.8(3)  |
| C1   | 23.8(4) | 34.1(4) | 36.3(5)   | -0.1(4)  | 3.5(3)   | -3.6(3)  |
| C2   | 26.8(4) | 27.9(4) | 39.1(5)   | 2.3(3)   | 1.7(3)   | 2.1(3)   |
| C3   | 24.7(4) | 29.3(4) | 33.8(4)   | 3.4(3)   | 3.7(3)   | -1.5(3)  |
| C4   | 35.2(5) | 38.0(5) | 35.4(5)   | 5.3(4)   | 0.2(4)   | -1.6(4)  |
| C5   | 39.9(5) | 55.2(6) | 34.1(5)   | -2.0(4)  | 2.3(4)   | -6.7(5)  |
| C6   | 39.4(5) | 48.9(6) | 49.7(6)   | -17.1(5) | 6.7(5)   | -3.0(4)  |
| C7   | 34.6(5) | 32.2(5) | 55.7(7)   | -6.3(4)  | 4.1(4)   | 1.9(4)   |
| C8   | 24.7(4) | 28.2(4) | 40.6(5)   | 2.4(3)   | 3.9(3)   | -2.1(3)  |
| C9   | 29.9(4) | 29.4(4) | 46.6(6)   | 9.0(4)   | -1.1(4)  | 0.7(3)   |
| C10  | 28.7(4) | 39.5(5) | 35.7(5)   | 9.0(4)   | -1.9(4)  | -4.1(4)  |
| C11  | 29.3(4) | 40.4(5) | 40.3(5)   | -1.0(4)  | 1.0(4)   | -4.3(4)  |
| C12  | 33.0(5) | 38.4(5) | 45.6(6)   | -2.1(4)  | -0.9(4)  | -3.8(4)  |
| C13  | 43.6(6) | 34.0(5) | 53.7(6)   | -7.9(4)  | -3.7(5)  | -2.5(4)  |
| C14  | 63.2(8) | 40.8(6) | 95.5(12)  | -5.6(7)  | -13.3(8) | 6.1(6)   |
| C15  | 56.4(7) | 55.7(7) | 54.3(7)   | -18.0(6) | 5.3(6)   | -0.4(6)  |
| C16  | 49.1(6) | 34.7(5) | 57.7(7)   | -3.9(5)  | -7.4(5)  | -12.9(4) |



C17 37.8(5)38.7(5)43.3(6)-4.3(4) -3.3(4) -13.5(4)  
 C18 44.3(6)50.8(7)82.1(10)9.1(6) 7.1(6) -19.5(5)  
 C19 35.0(6)68.8(9)98.5(12)8.5(8) 15.2(7)-11.0(6)  
 C20 34.5(5)53.5(6)50.3(6)-5.6(5) -2.5(4) -5.2(5)  
 C21 36.6(5)42.0(5)34.9(5)-2.7(4) -4.1(4) -6.8(4)  
 C22 50.6(7)49.8(6)62.4(8)13.4(6)1.6(6) -4.3(5)  
 C23 69.4(9)47.5(7)70.3(9)11.7(6)-15.7(7)-2.8(6)  
 C24 60.4(8)54.0(7)68.2(9)-7.1(6) -22.3(7)10.9(6)  
 C25 43.7(6)69.3(9)72.1(9)-9.1(7) -5.5(6) 9.0(6)

**Table S7** Bond Lengths for **3hk**

| Atom | Atom | Length/Å   | Atom | Atom | Length/Å   |
|------|------|------------|------|------|------------|
| O1   | C16  | 1.2069(13) | C11  | C12  | 1.1907(14) |
| N1   | C17  | 1.3120(13) | C12  | C13  | 1.4719(14) |
| N1   | C21  | 1.3599(14) | C13  | C14  | 1.5303(17) |
| C1   | C2   | 1.3729(13) | C13  | C15  | 1.5363(18) |
| C1   | C10  | 1.4204(13) | C13  | C16  | 1.5482(16) |
| C1   | C11  | 1.4327(13) | C16  | C17  | 1.4992(16) |
| C2   | C3   | 1.4130(13) | C17  | C18  | 1.4104(16) |
| C3   | C4   | 1.4147(13) | C18  | C19  | 1.349(2)   |
| C3   | C8   | 1.4164(12) | C19  | C20  | 1.4042(18) |
| C4   | C5   | 1.3634(15) | C20  | C21  | 1.4094(15) |
| C5   | C6   | 1.4015(17) | C20  | C25  | 1.4146(18) |
| C6   | C7   | 1.3568(17) | C21  | C22  | 1.4062(15) |

|    |     |            |     |     |            |
|----|-----|------------|-----|-----|------------|
| C7 | C8  | 1.4141(14) | C22 | C23 | 1.3616(18) |
| C8 | C9  | 1.4169(14) | C23 | C24 | 1.395(2)   |
| C9 | C10 | 1.3587(15) | C24 | C25 | 1.354(2)   |

**Table S8** Bond Angles for **3hk**

| Atom | Atom | Atom | Angle/°    | Atom | Atom | Atom | Angle/°    |
|------|------|------|------------|------|------|------|------------|
| C17  | N1   | C21  | 118.08(9)  | C14  | C13  | C15  | 109.87(11) |
| C2   | C1   | C10  | 119.67(9)  | C14  | C13  | C16  | 109.09(10) |
| C2   | C1   | C11  | 120.69(9)  | C15  | C13  | C16  | 110.14(10) |
| C10  | C1   | C11  | 119.48(9)  | O1   | C16  | C13  | 119.99(11) |
| C1   | C2   | C3   | 120.89(8)  | O1   | C16  | C17  | 119.64(11) |
| C2   | C3   | C4   | 121.75(8)  | C17  | C16  | C13  | 120.33(9)  |
| C2   | C3   | C8   | 119.13(8)  | N1   | C17  | C16  | 117.96(10) |
| C4   | C3   | C8   | 119.11(9)  | N1   | C17  | C18  | 123.33(11) |
| C5   | C4   | C3   | 120.46(9)  | C18  | C17  | C16  | 118.69(10) |
| C4   | C5   | C6   | 120.18(10) | C19  | C18  | C17  | 118.68(11) |
| C7   | C6   | C5   | 120.99(10) | C18  | C19  | C20  | 120.36(11) |
| C6   | C7   | C8   | 120.47(10) | C19  | C20  | C21  | 116.99(11) |
| C3   | C8   | C9   | 118.85(8)  | C19  | C20  | C25  | 124.06(12) |
| C7   | C8   | C3   | 118.78(9)  | C21  | C20  | C25  | 118.94(12) |
| C7   | C8   | C9   | 122.36(9)  | N1   | C21  | C20  | 122.53(10) |
| C10  | C9   | C8   | 121.01(9)  | N1   | C21  | C22  | 118.50(10) |
| C9   | C10  | C1   | 120.41(9)  | C22  | C21  | C20  | 118.97(11) |
| C12  | C11  | C1   | 173.51(10) | C23  | C22  | C21  | 120.20(12) |

|     |     |     |            |     |     |     |            |
|-----|-----|-----|------------|-----|-----|-----|------------|
| C11 | C12 | C13 | 173.30(11) | C22 | C23 | C24 | 121.12(13) |
| C12 | C13 | C14 | 109.44(10) | C25 | C24 | C23 | 119.99(12) |
| C12 | C13 | C15 | 111.95(10) | C24 | C25 | C20 | 120.76(13) |
| C12 | C13 | C16 | 106.27(9)  |     |     |     |            |

**Table S9** Hydrogen Atom Coordinates ( $\text{\AA}\times 10^4$ ) and Isotropic Displacement Parameters ( $\text{\AA}^2\times 10^3$ ) **3hk**.

| Atom | x       | y | z       | U(eq)    |     |
|------|---------|---|---------|----------|-----|
| H2   | 2526.93 |   | 5153.97 | 2414.44  | 37  |
| H4   | 2285.19 |   | 4755.32 | -441.99  | 43  |
| H5   | 2352.15 |   | 3991.32 | -2395.69 | 52  |
| H6   | 2837.56 |   | 3082.17 | -1728.76 | 55  |
| H7   | 3239.16 |   | 2927.7  | 880.31   | 49  |
| H9   | 3452.68 |   | 3315.7  | 3791.01  | 42  |
| H10  | 3407.45 |   | 4081.46 | 5724.94  | 42  |
| H14A | 3012.06 |   | 6767.41 | 5694.4   | 100 |
| H14B | 3051.23 |   | 7039.74 | 7516.67  | 100 |
| H14C | 2492.08 |   | 6636.76 | 6999.01  | 100 |
| H15A | 2686.31 |   | 5969.88 | 9470.39  | 83  |
| H15B | 3269.67 |   | 6336.26 | 9991.83  | 83  |
| H15C | 3311.94 |   | 5632.93 | 9668.9   | 83  |
| H18  | 5112.2  |   | 6126.68 | 6277.88  | 71  |
| H19  | 5754.63 |   | 5307.87 | 6379.04  | 81  |
| H22  | 3963.87 |   | 4154.13 | 9369.44  | 65  |

|     |         |         |         |    |
|-----|---------|---------|---------|----|
| H23 | 4579.13 | 3317.84 | 9527.36 | 75 |
| H24 | 5556.36 | 3335.3  | 8424.33 | 73 |
| H25 | 5925.12 | 4200.28 | 7209.04 | 74 |

## 5. References

- (1) X. Huang, S. Wu, W. Wu, P. Li, C. Fu and S. Ma, *Nat. Commun.* 2016, **7**, 12382.
- (2) Y. Li, H. Zou, J. Gong, J. Xiang, T. Luo, J. Quan, G. Wang and Z. Yang, *Org. Lett.*, 2007, **9**, 4057.
- (3) M. D. Aparece, W. Hu and J. P. Morken, *ACS. Catal.* 2019, **9**, 11381.
- (4) H. Zou, L. Zhou, Y. Li, Y. Cui, H. Zhong, Z. Pan, Z. Yang and J. Quan, *J. Med. Chem.* 2010, **53**, 994.
- (5) A. E. Nibbs, T. D. Montgomery, Y. Zhu and V. H. Rawal, *J. Org. Chem.* 2015, **80**, 4928.
- (6) H. Ito, Y. Sasaki and M. Sawamura, *J. Am. Chem. Soc.* 2008, **130**, 15774.
- (7) C. K. Hazra and M. Oestreich, *Org. Lett.* 2012, **14**, 4010.
- (8) K. Watanabe, Y. Miyazaki, M. Okubo, B. Zhou, H. Tsuji and M. Kawatsura, *Org. Lett.* 2018, **20**, 5448.
- (9) S. Wu, X. Huang, W. Wu, P. Li, C. Fu and S. Ma, *Nat. Commu.* 2015, **6**, 7946.

## 6. NMR spectra

$^1\text{H}$  NMR spectrum of compound **3aa**

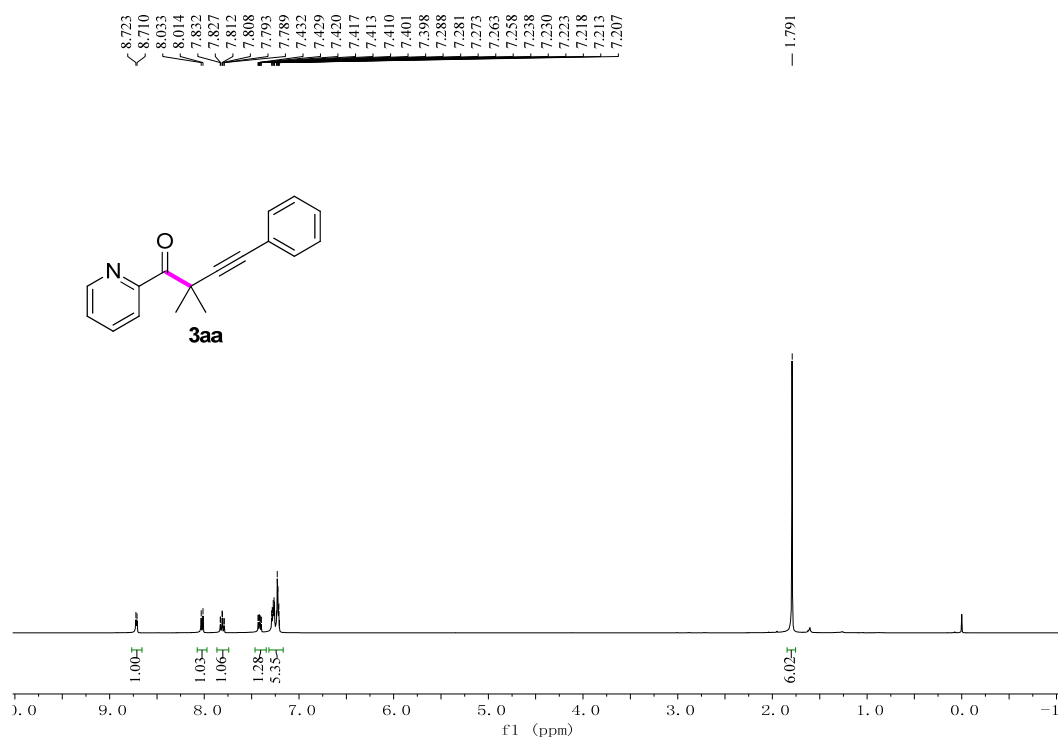

$^{13}\text{C}$  NMR spectrum of compound **3aa**

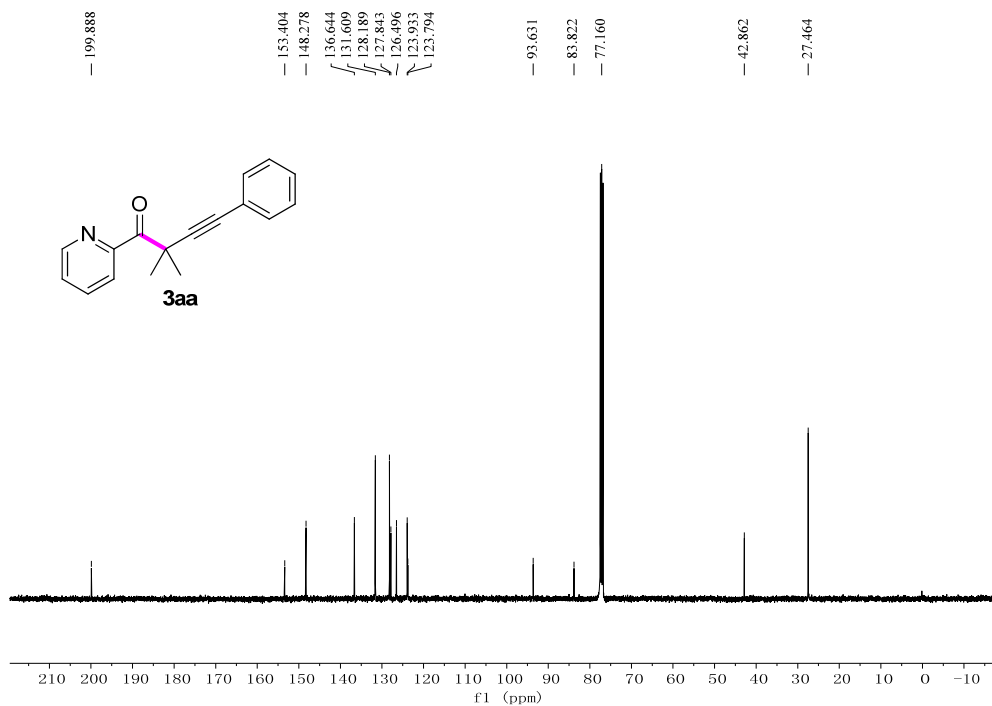

<sup>1</sup>H NMR spectrum of compound **3ba**

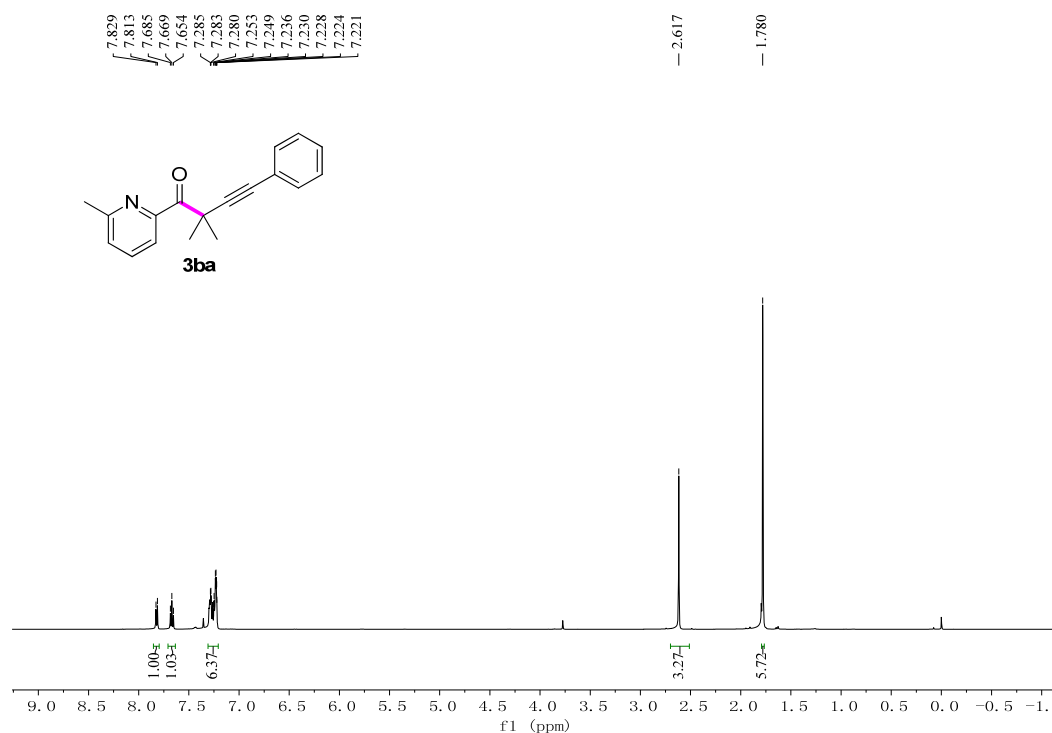

<sup>13</sup>C NMR spectrum of compound **3ba**

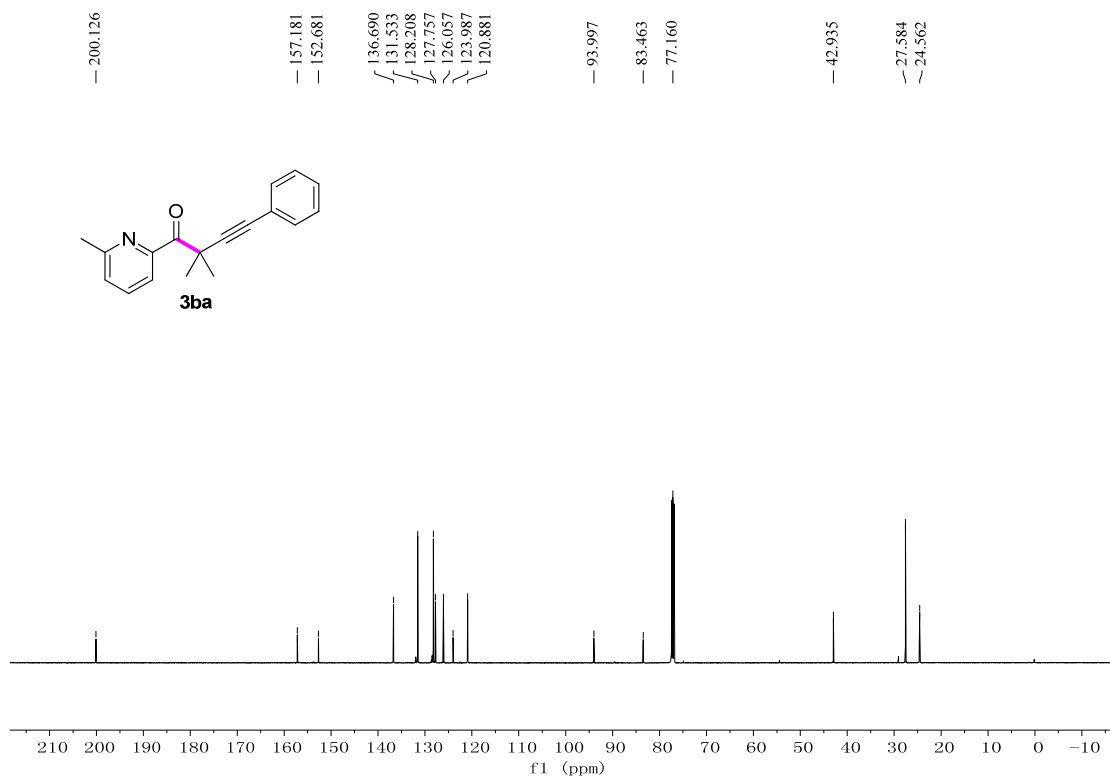

### <sup>1</sup>H NMR spectrum of compound **3ca**

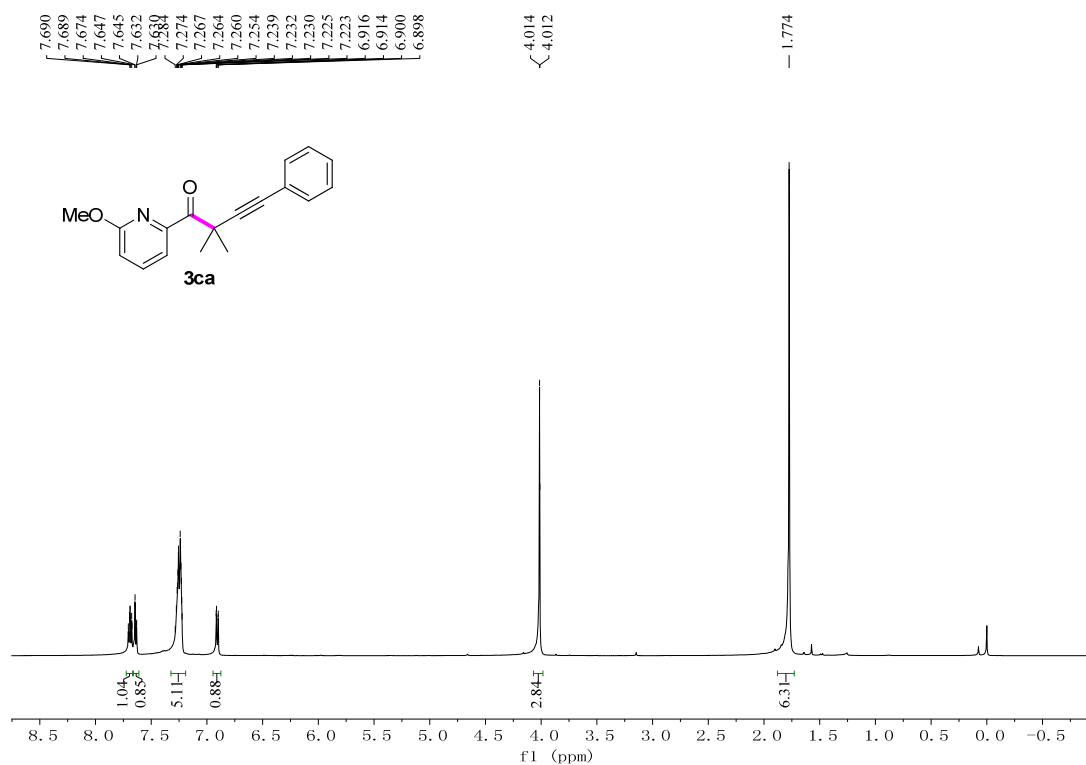

### <sup>13</sup>C NMR spectrum of compound **3ca**

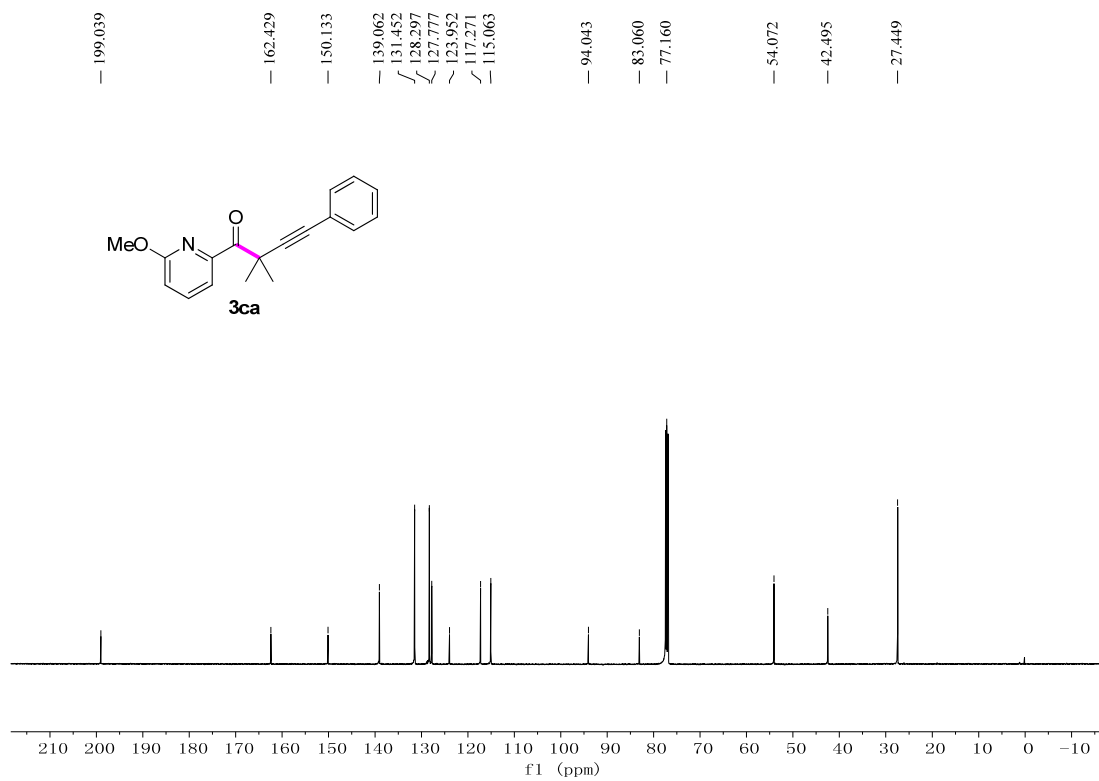

### <sup>1</sup>H NMR spectrum of compound **3da**

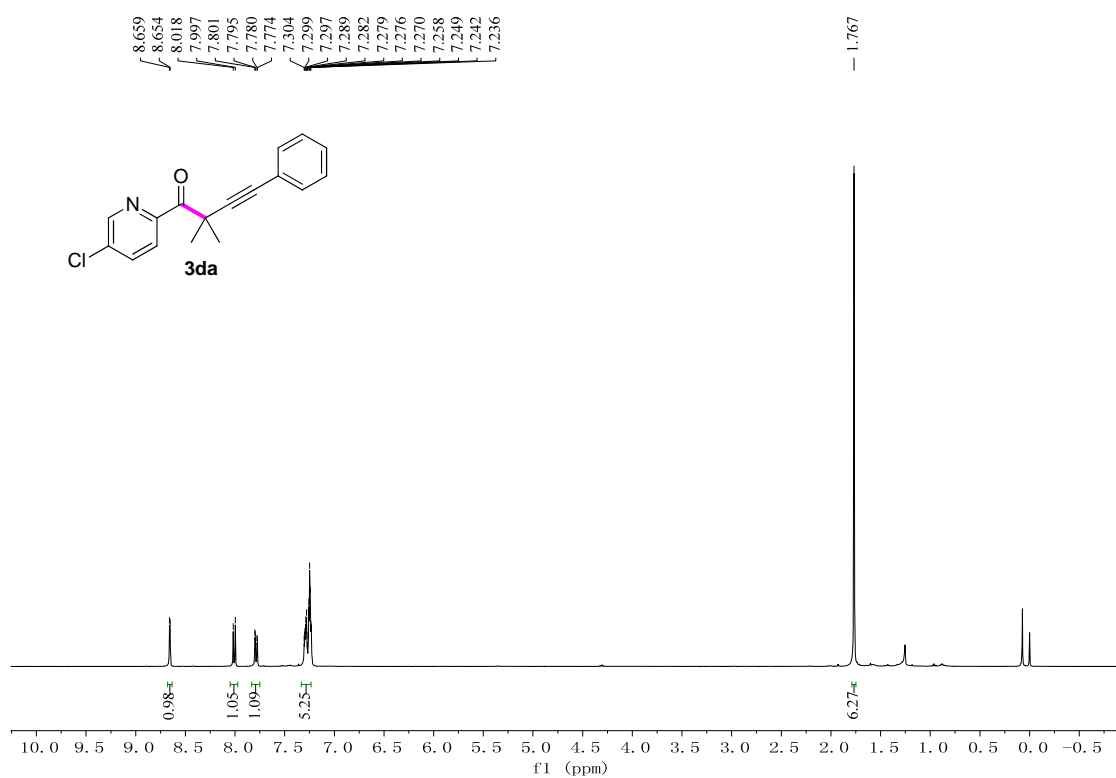

### <sup>13</sup>C NMR spectrum of compound **3da**

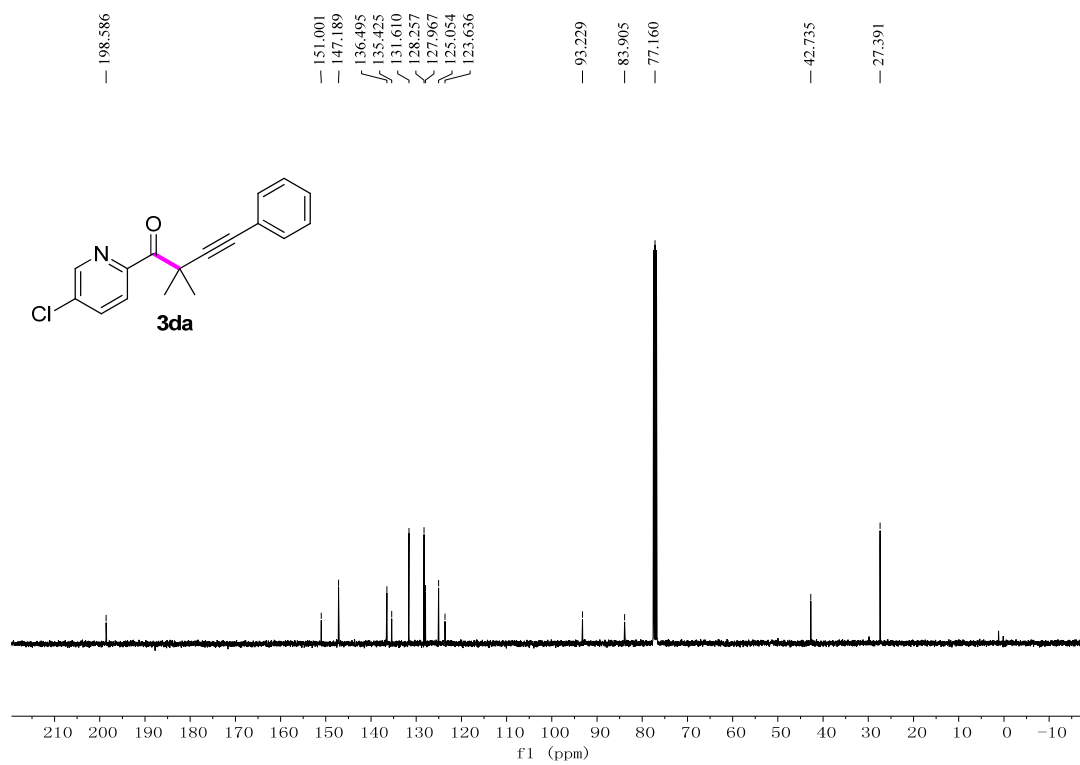



### <sup>1</sup>H NMR spectrum of compound **3ea**

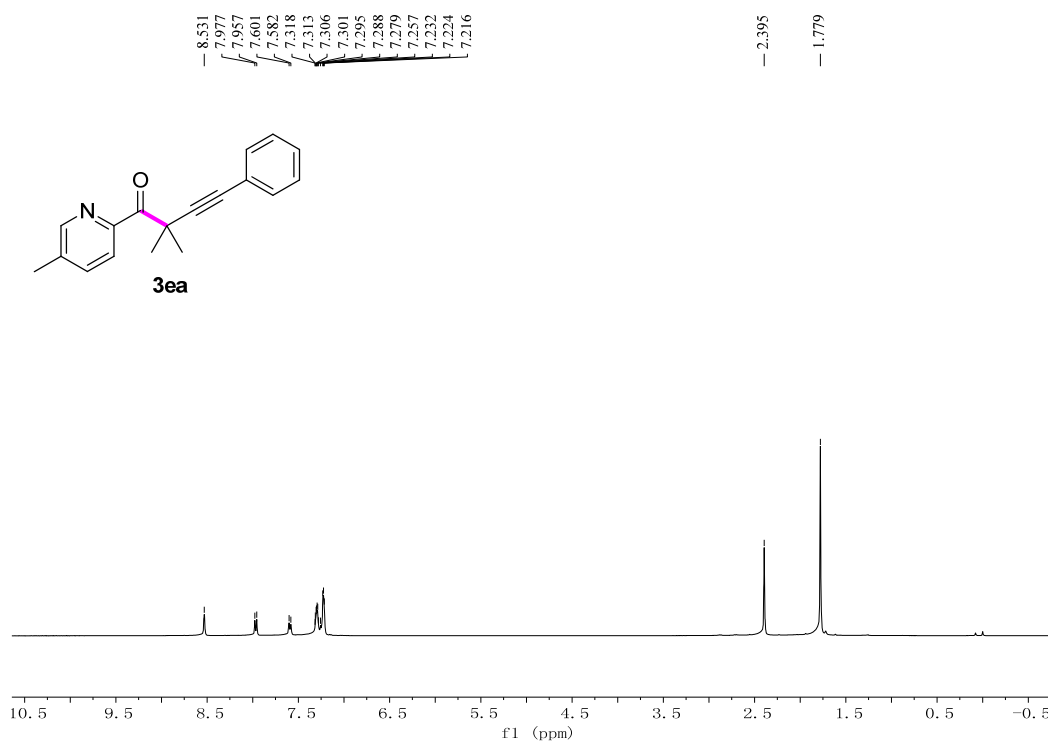

### <sup>13</sup>C NMR spectrum of compound **3ea**

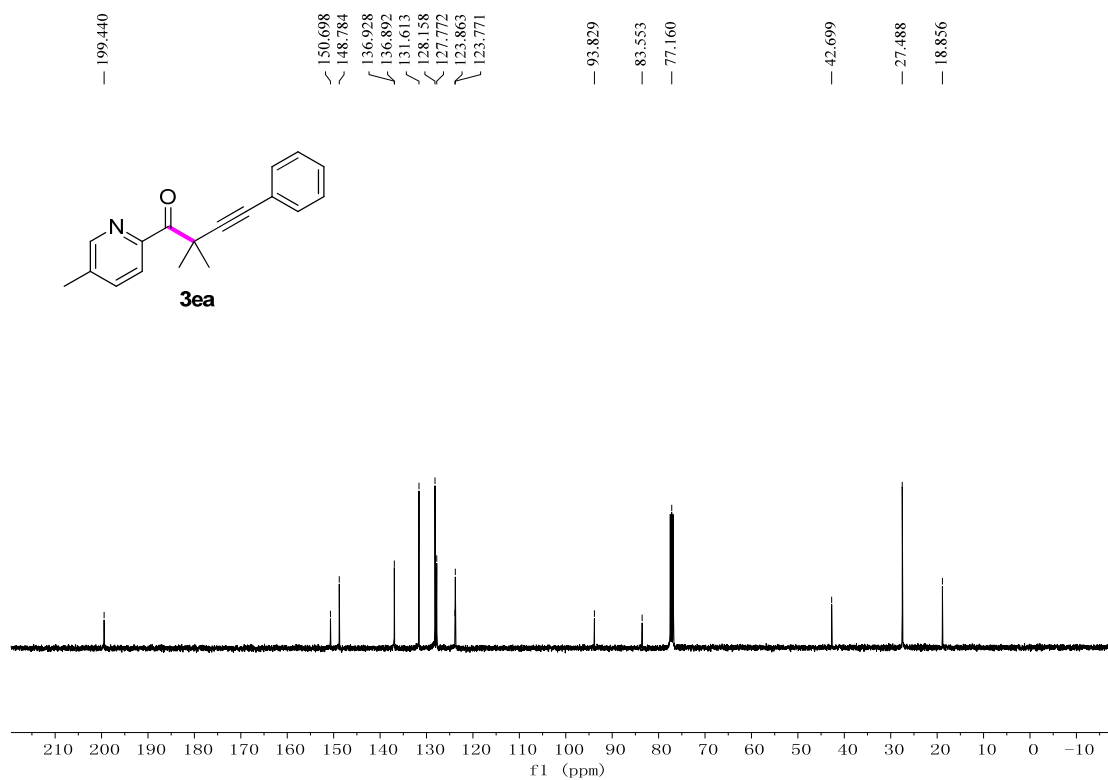

### <sup>1</sup>H NMR spectrum of compound **3fa**

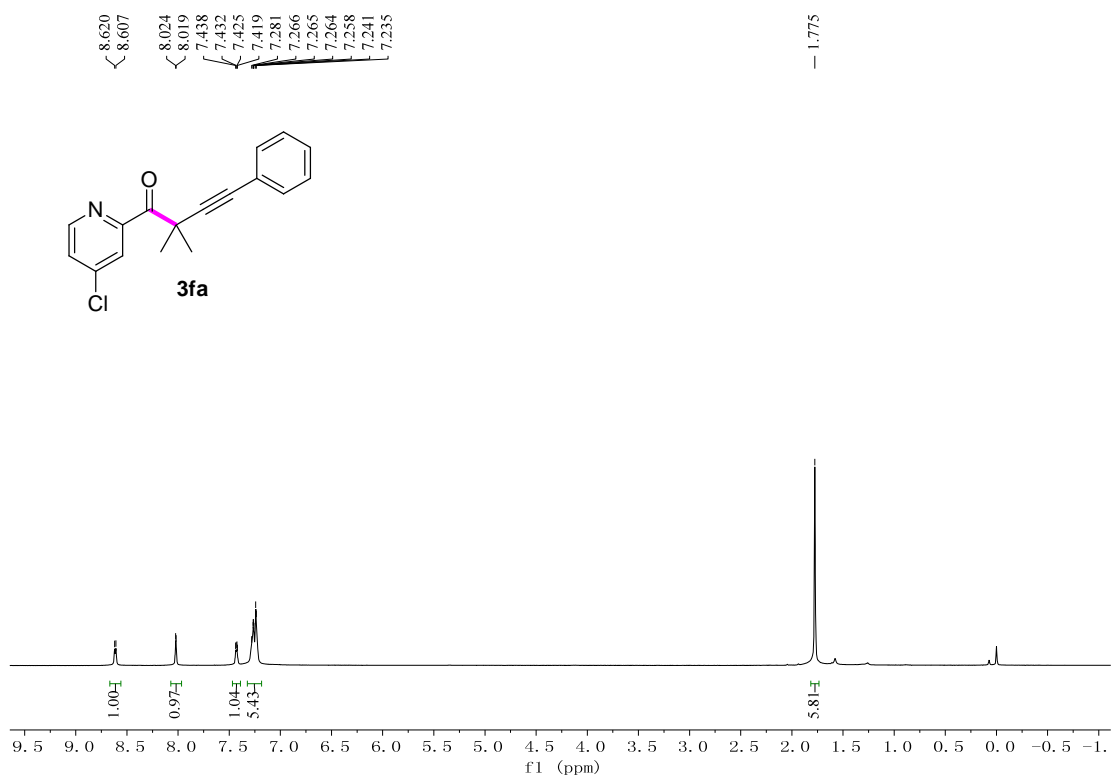

### <sup>13</sup>C NMR spectrum of compound **3fa**

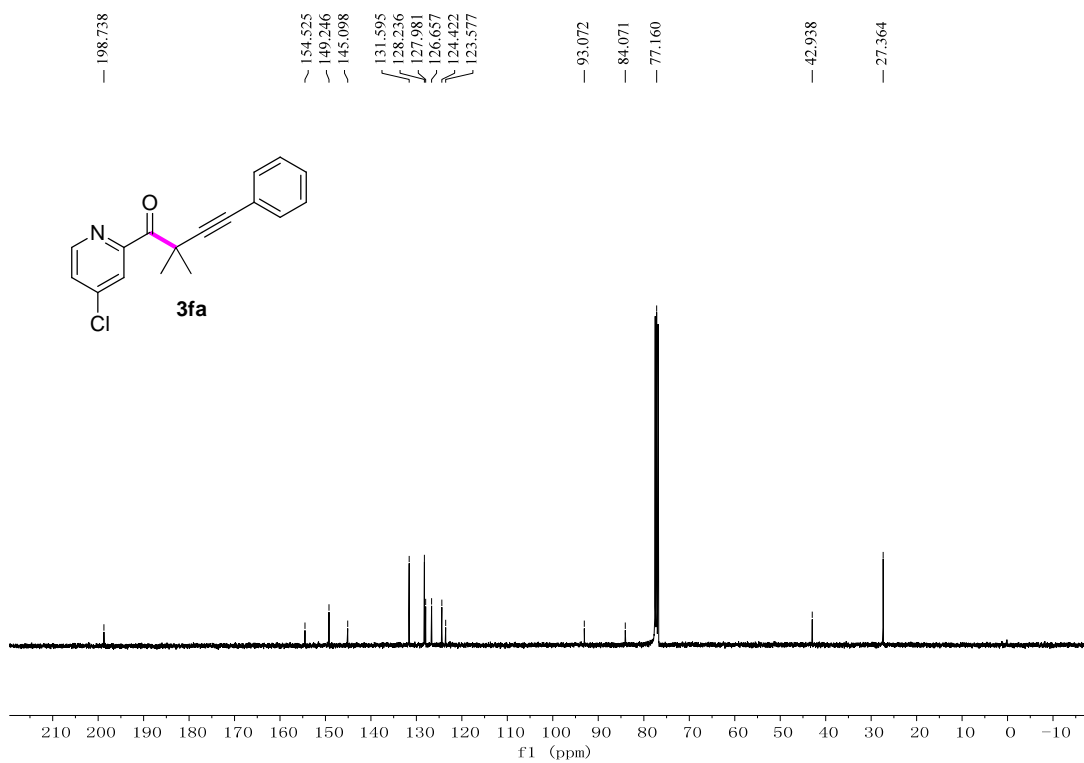

### <sup>1</sup>H NMR spectrum of compound **3ga**

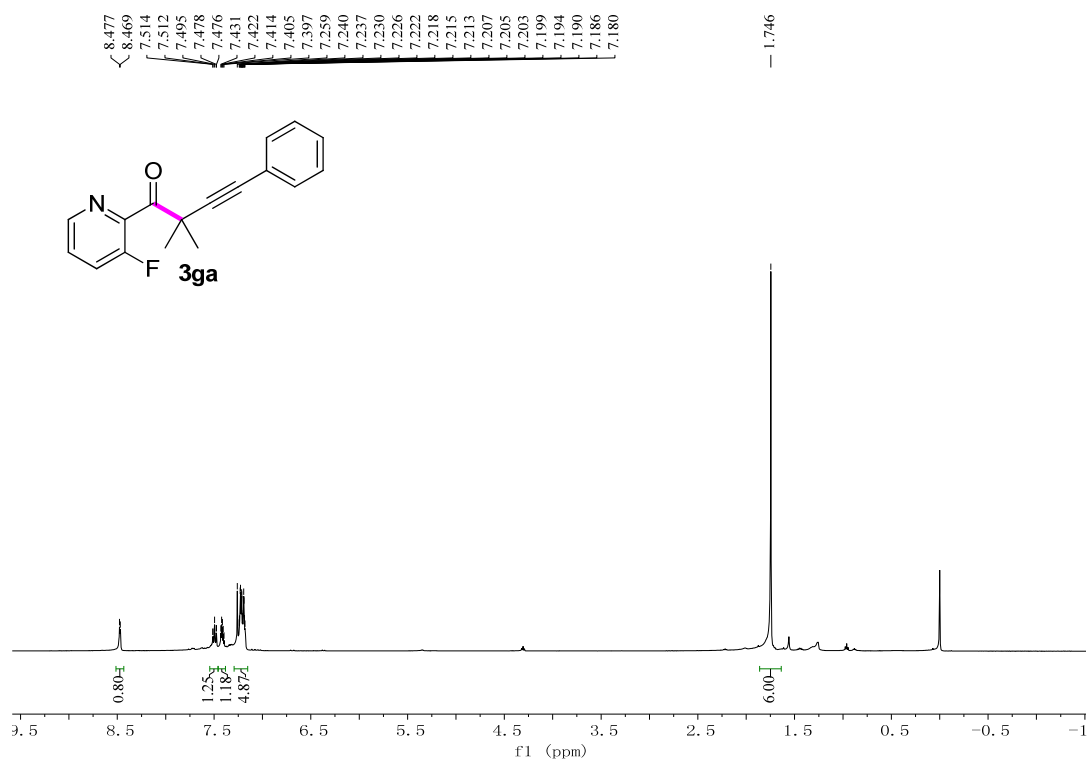

### <sup>13</sup>C NMR spectrum of compound **3ga**

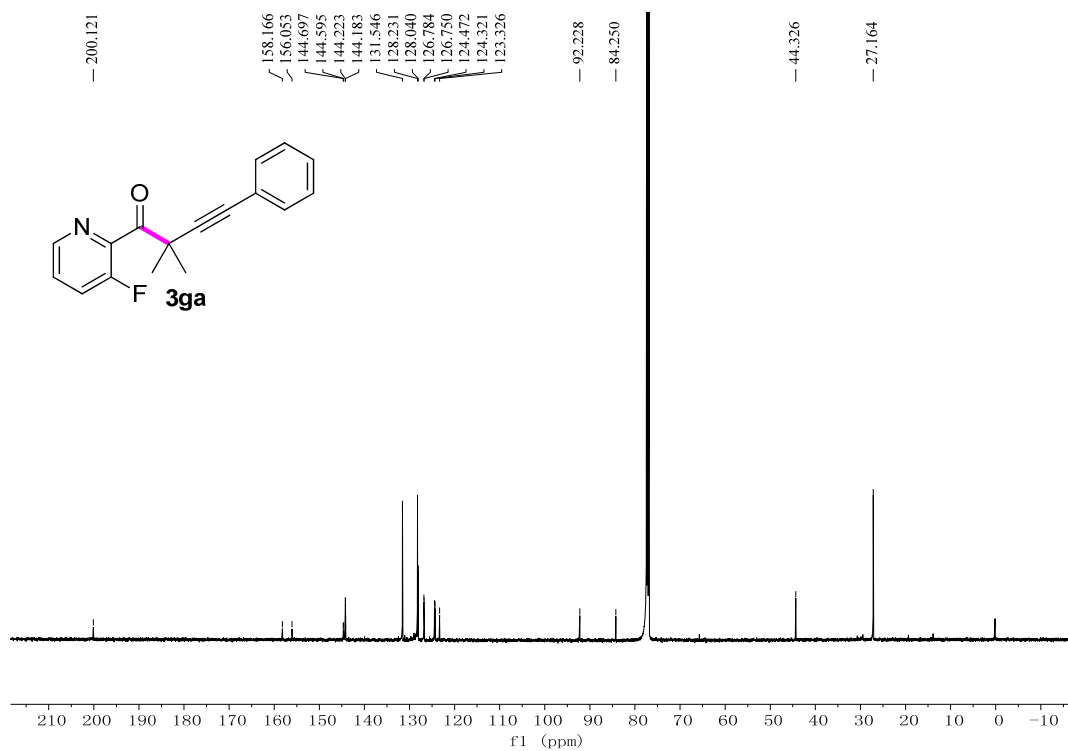

<sup>19</sup>F NMR spectrum of compound **3ga**

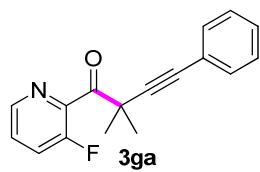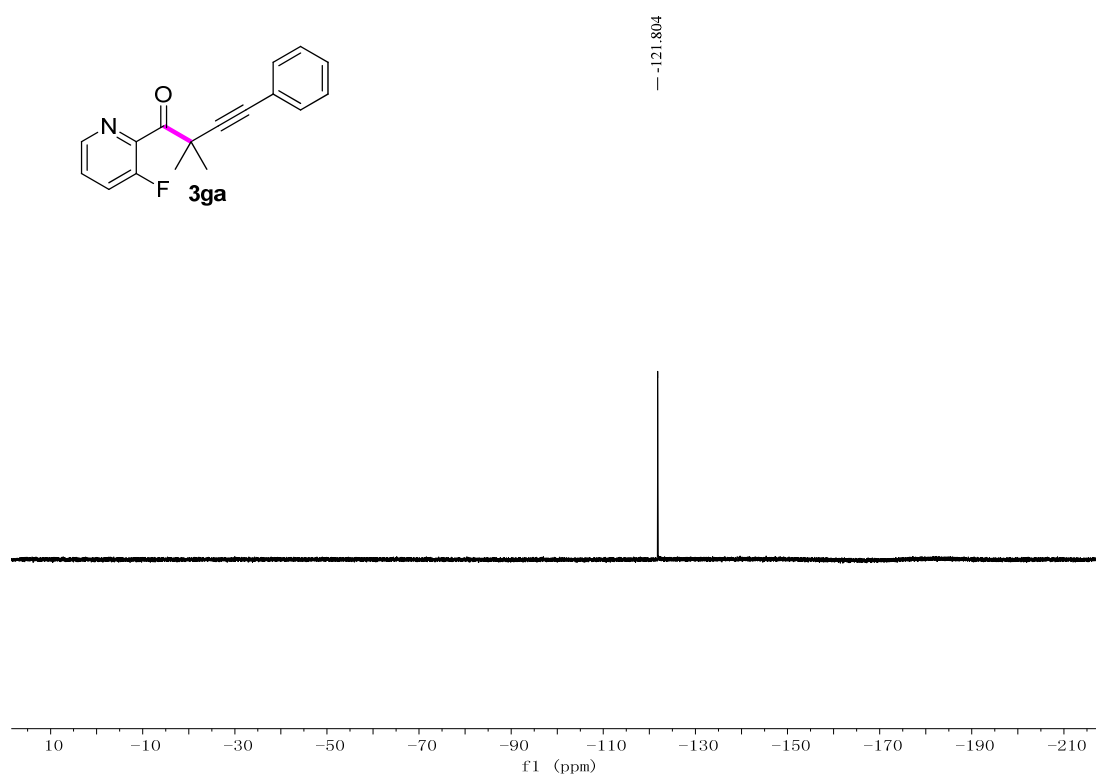

### <sup>1</sup>H NMR spectrum of compound **3ha**

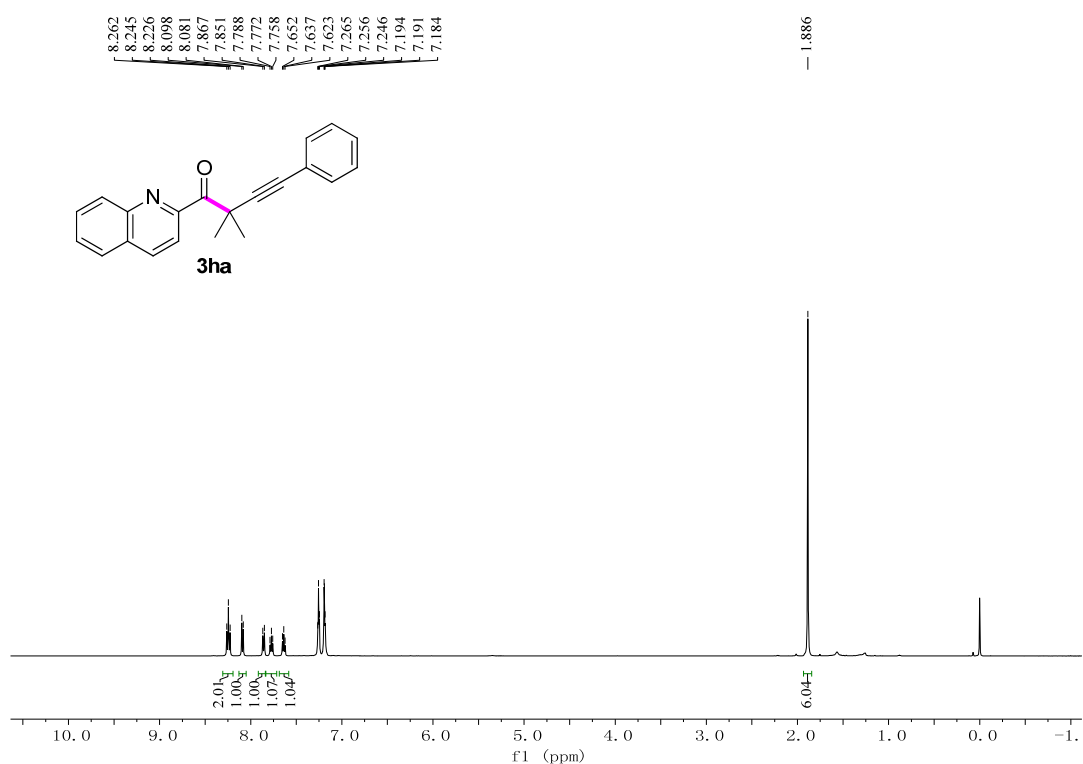

### <sup>13</sup>C NMR spectrum of compound **3ha**

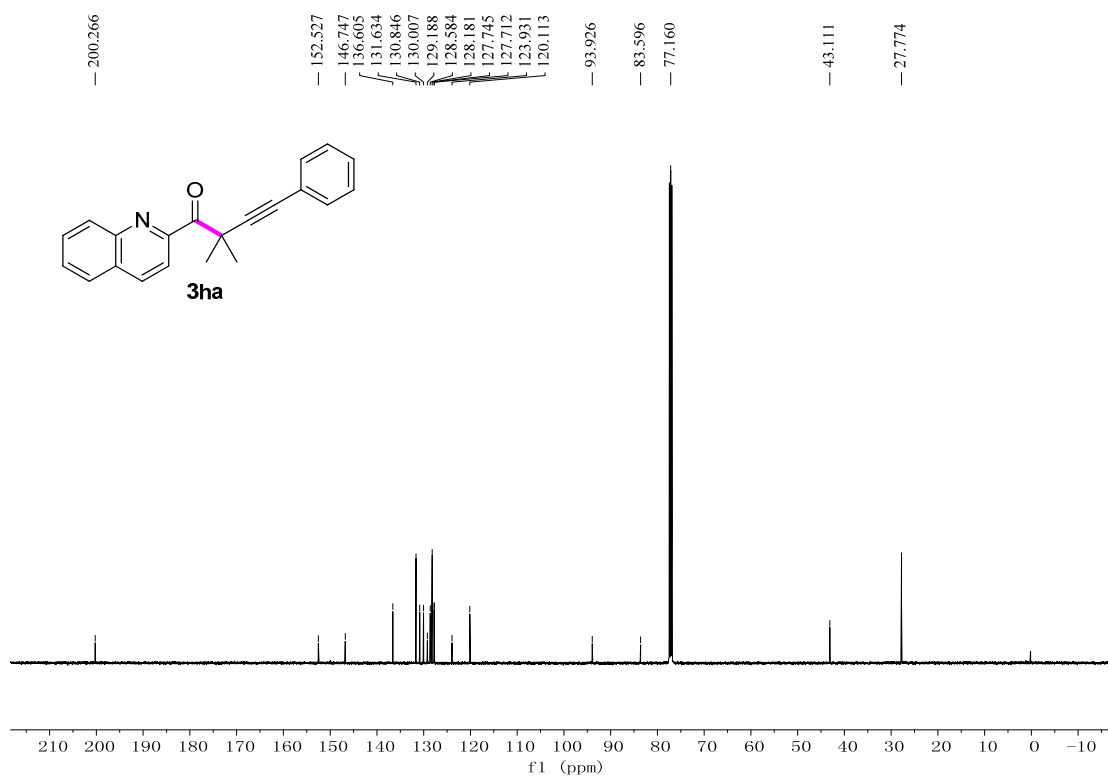

### <sup>1</sup>H NMR spectrum of compound **3ab**

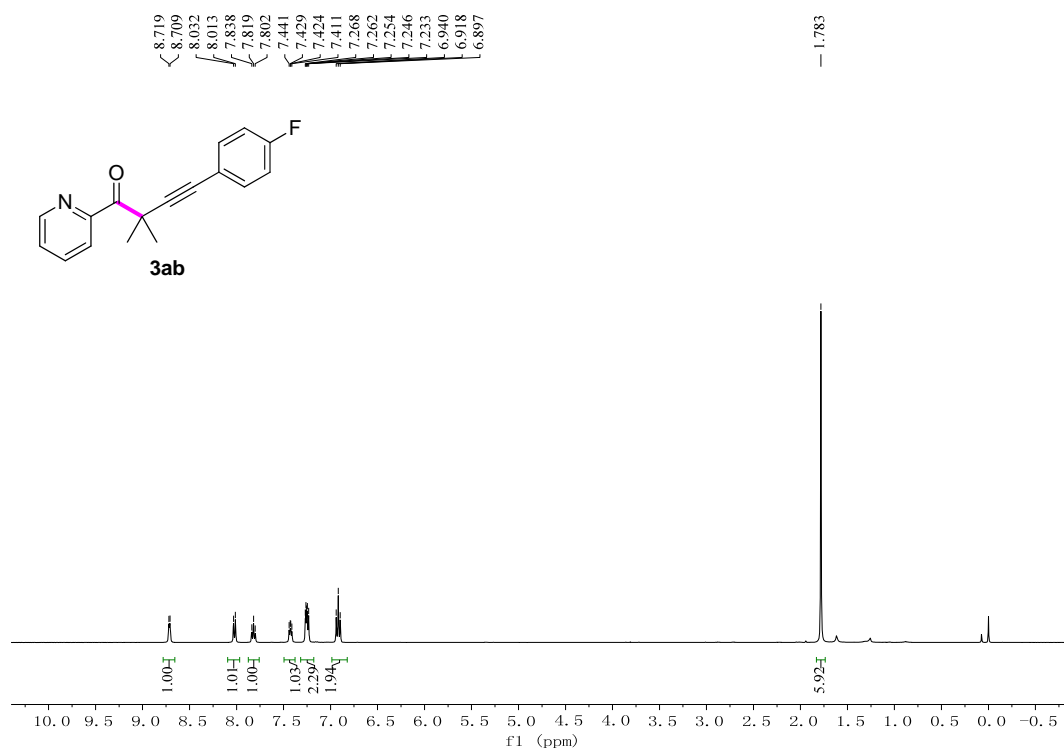

### <sup>13</sup>C NMR spectrum of compound **3ab**

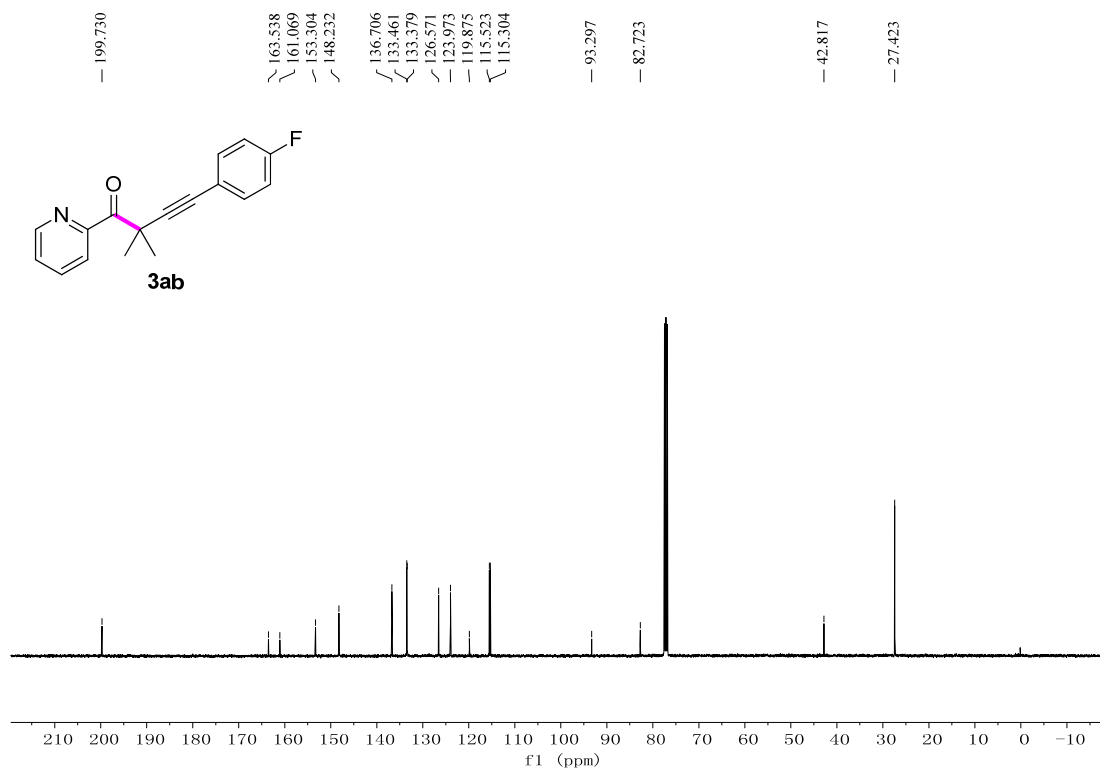

$^{19}\text{F}$  NMR spectrum of compound **3ab**

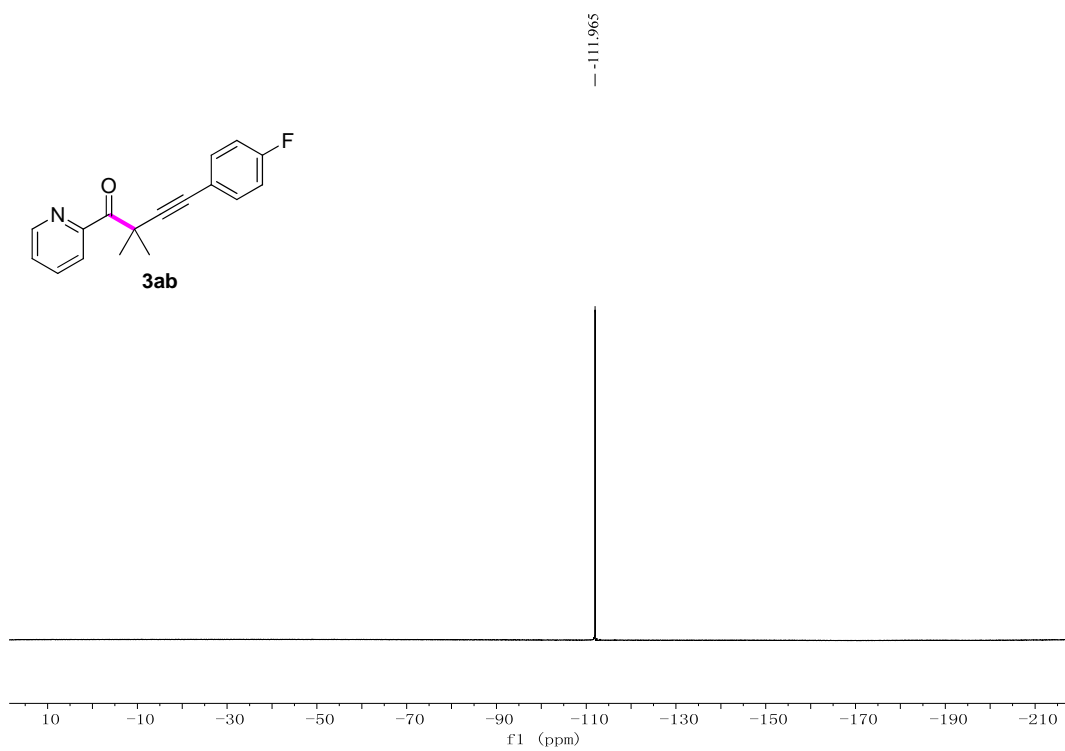

### <sup>1</sup>H NMR spectrum of compound **3ac**

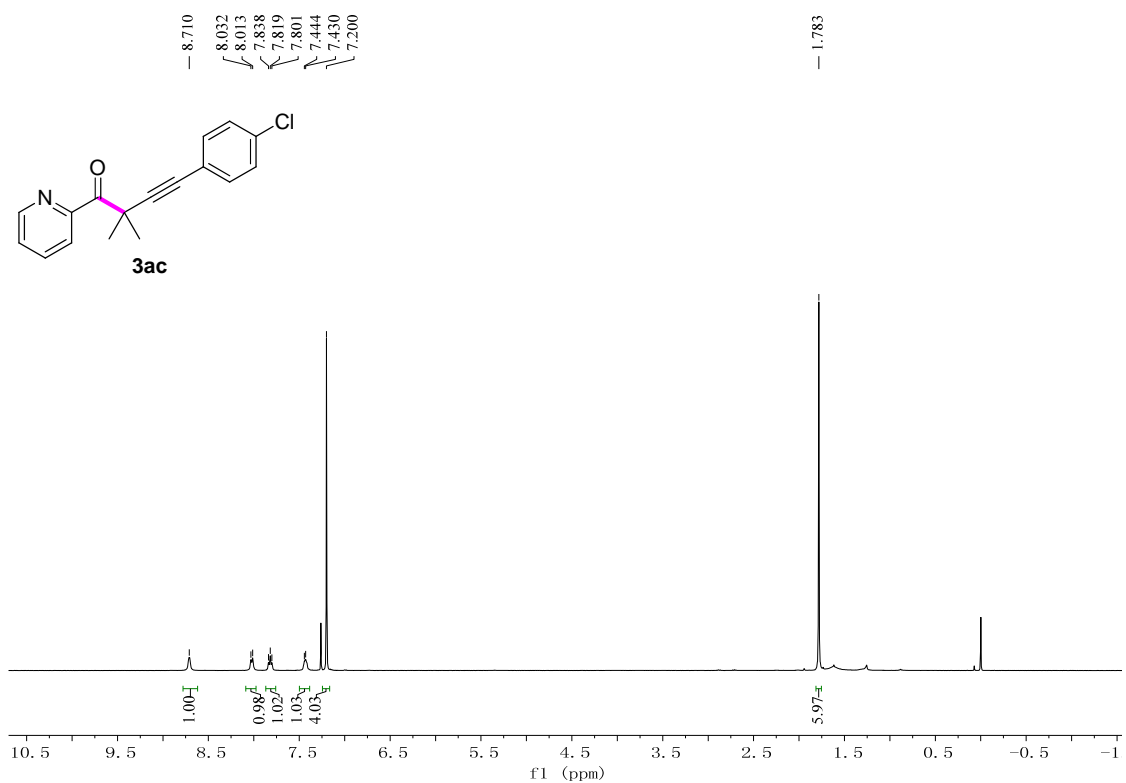

### <sup>13</sup>C NMR spectrum of compound **3ac**

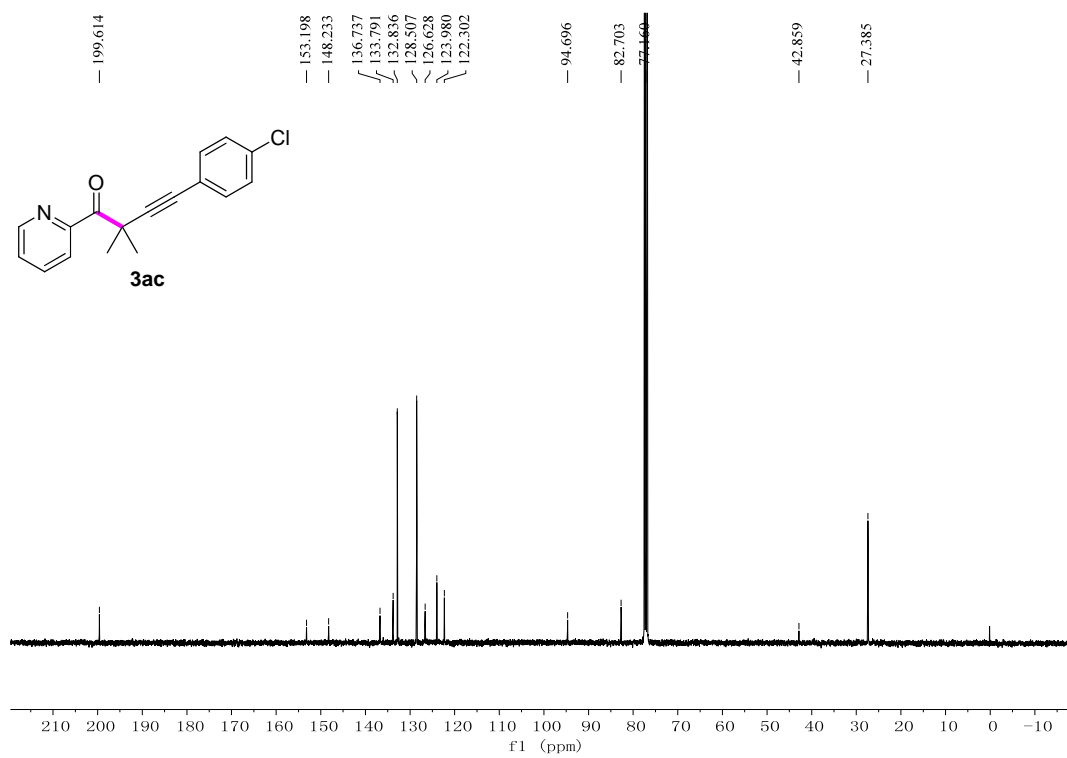



### $^1\text{H}$ NMR spectrum of compound **3ad**

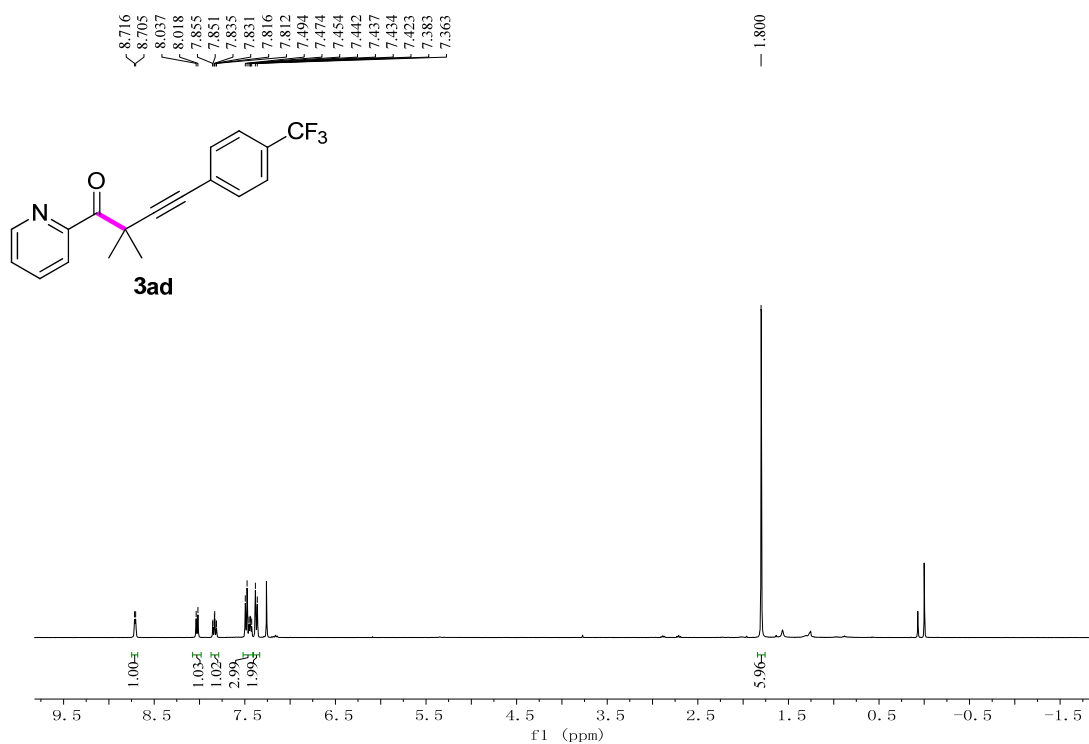

### $^{13}\text{C}$ NMR spectrum of compound **3ad**

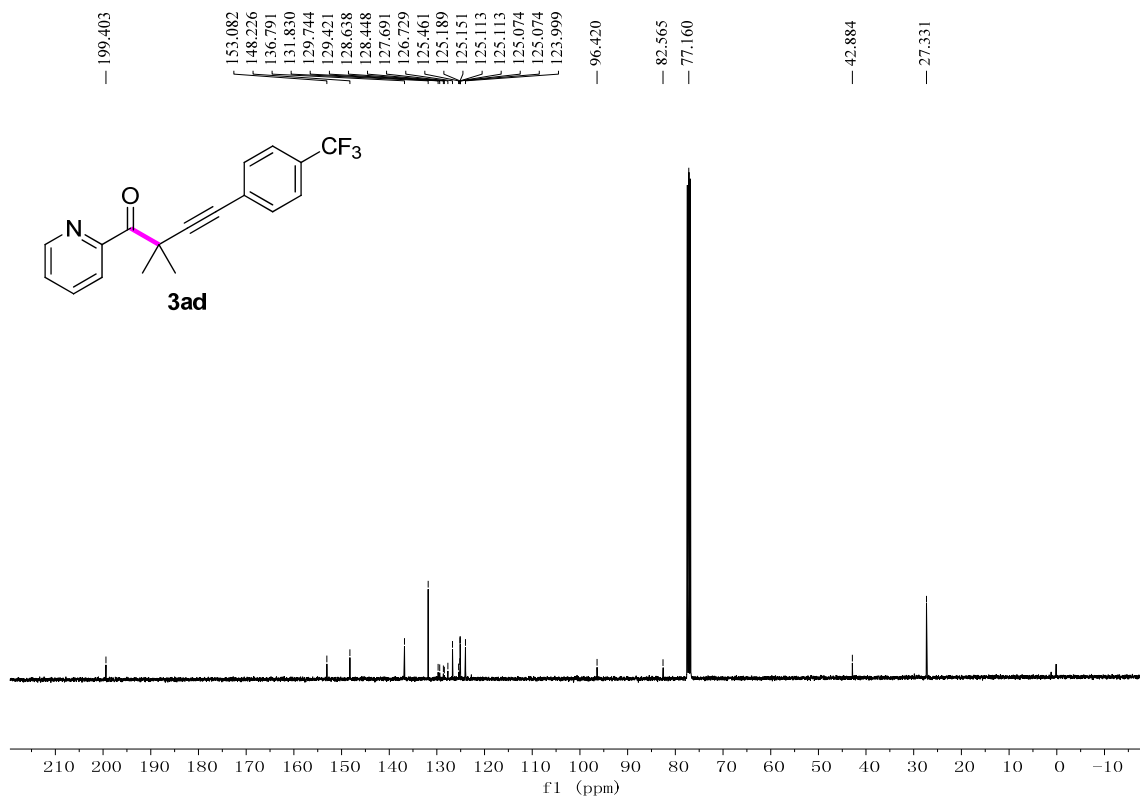

$^{19}\text{F}$  NMR spectrum of compound **3ad**

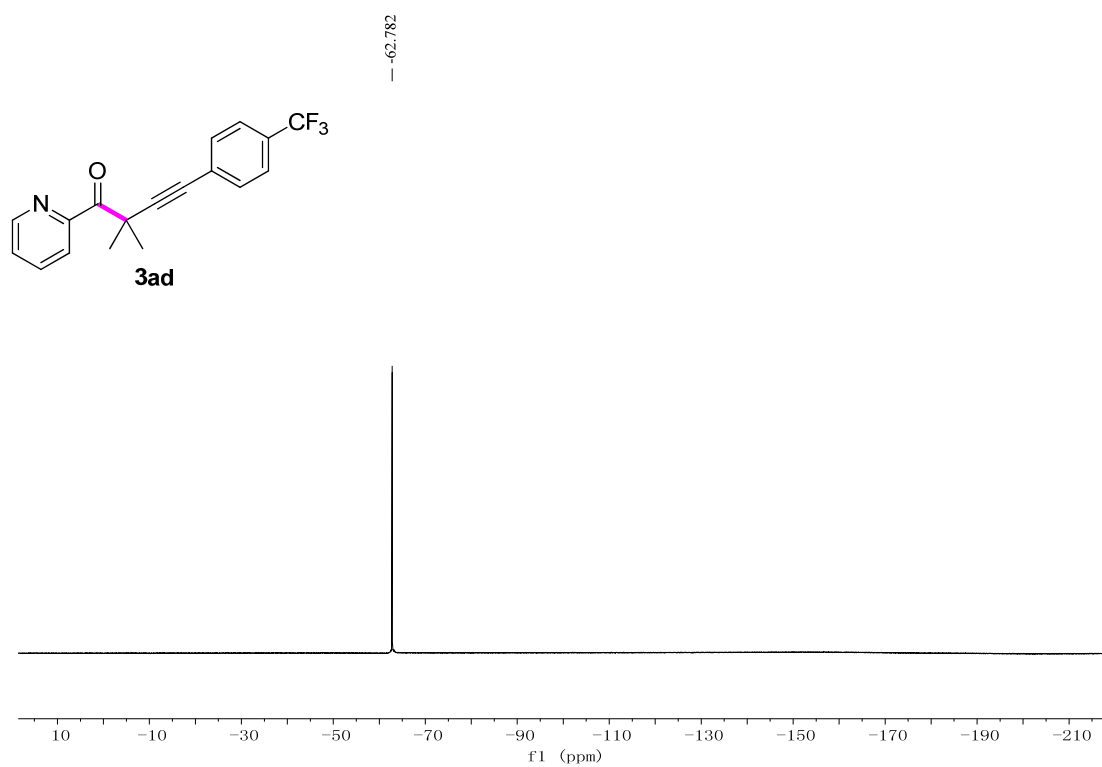

### <sup>1</sup>H NMR spectrum of compound **3ae**

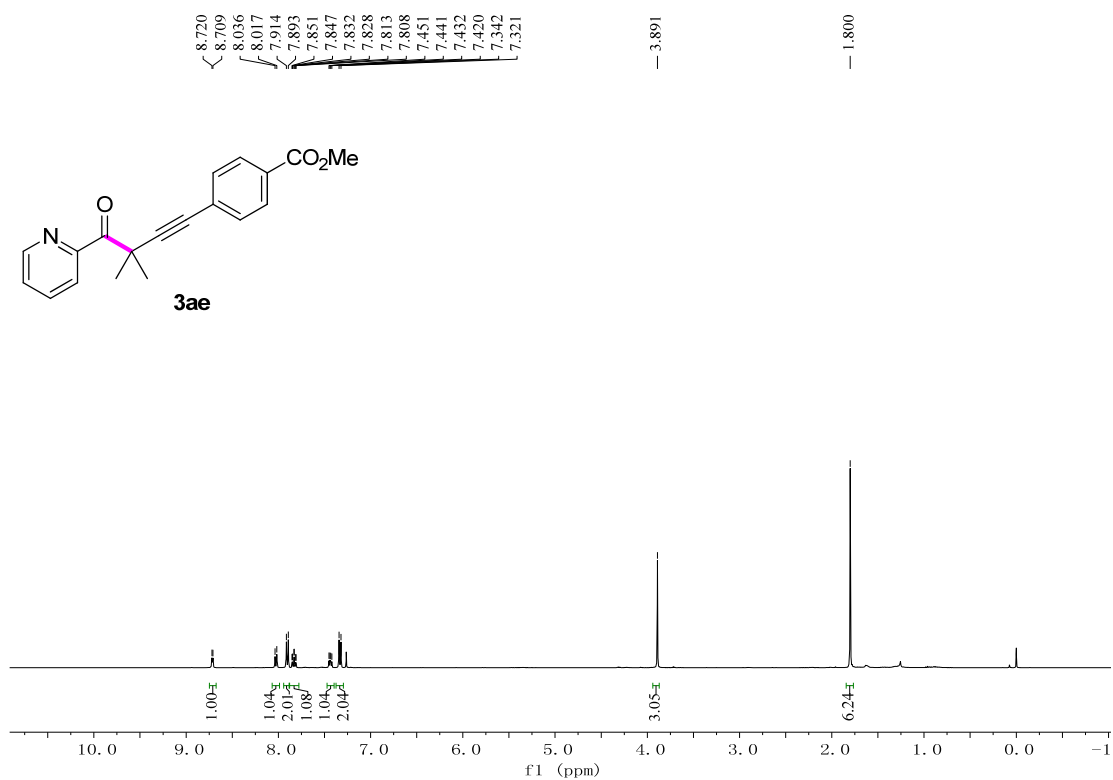

### <sup>13</sup>C NMR spectrum of compound **3ae**

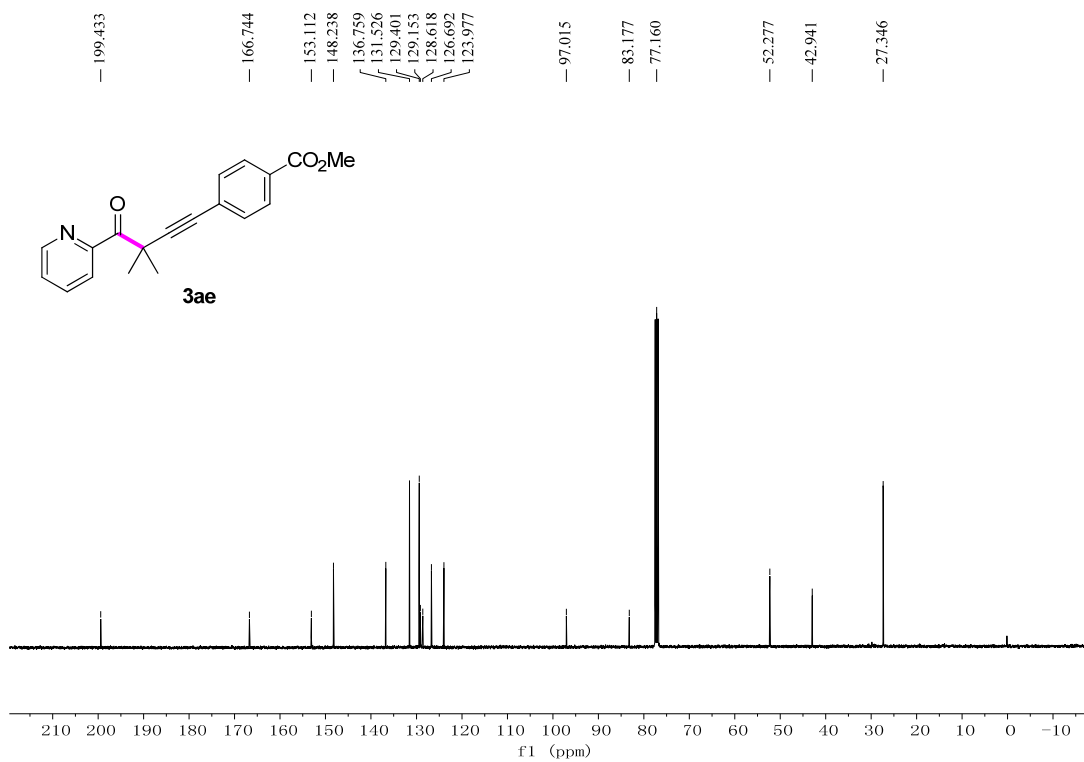

### $^1\text{H}$ NMR spectrum of compound **3af**

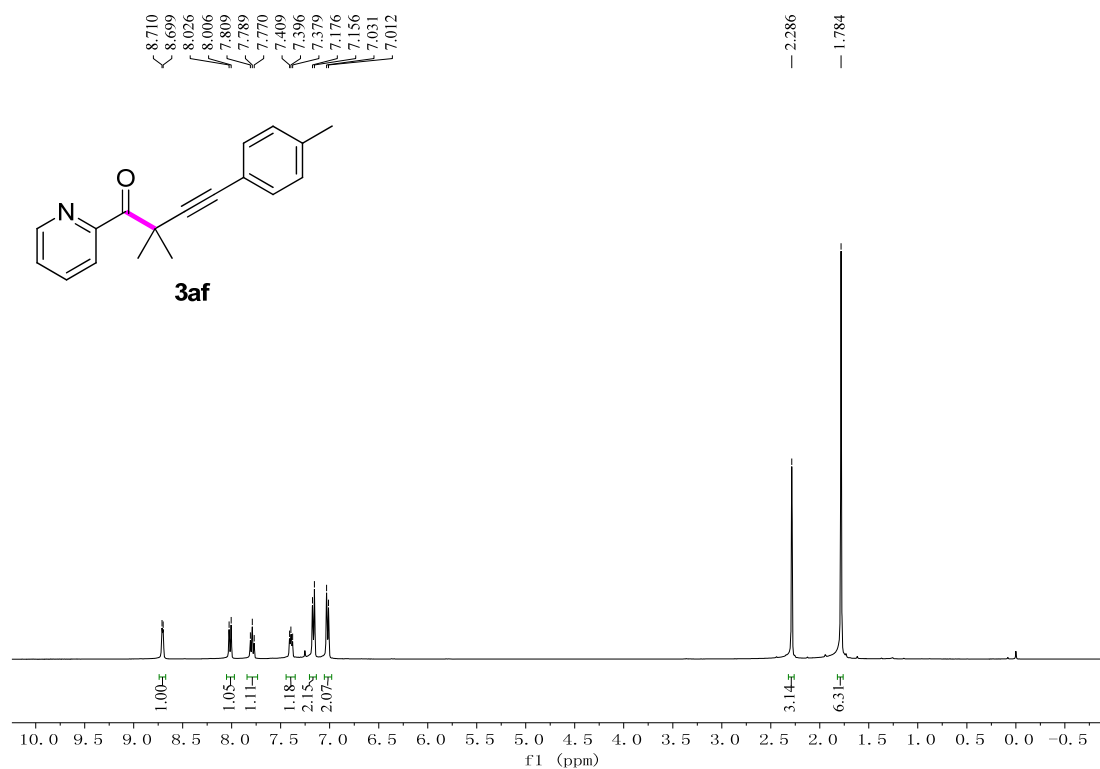

### $^{13}\text{C}$ NMR spectrum of compound **3af**

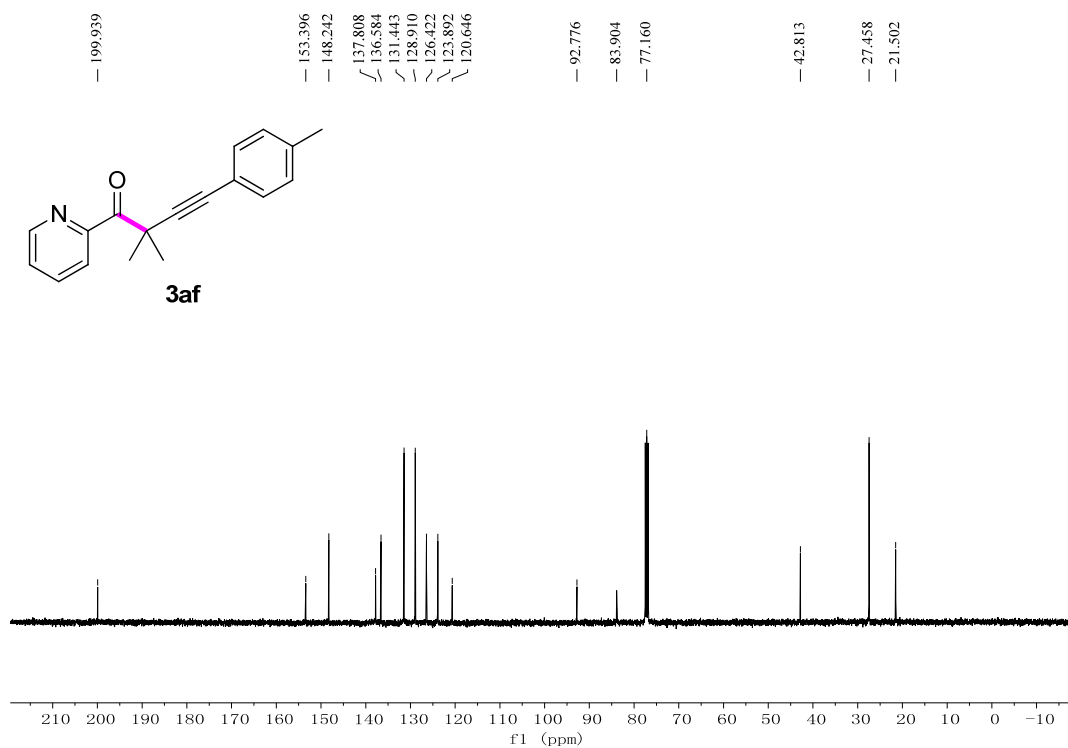

### <sup>1</sup>H NMR spectrum of compound **3ag**

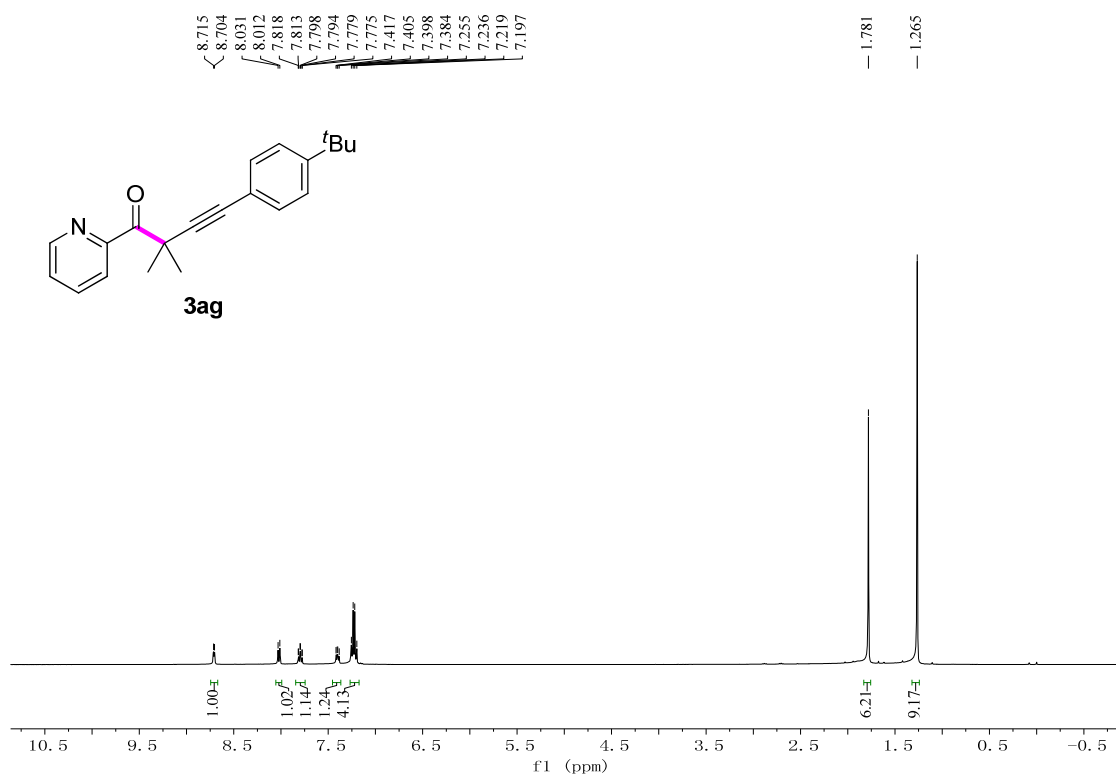

### <sup>13</sup>C NMR spectrum of compound **3ag**

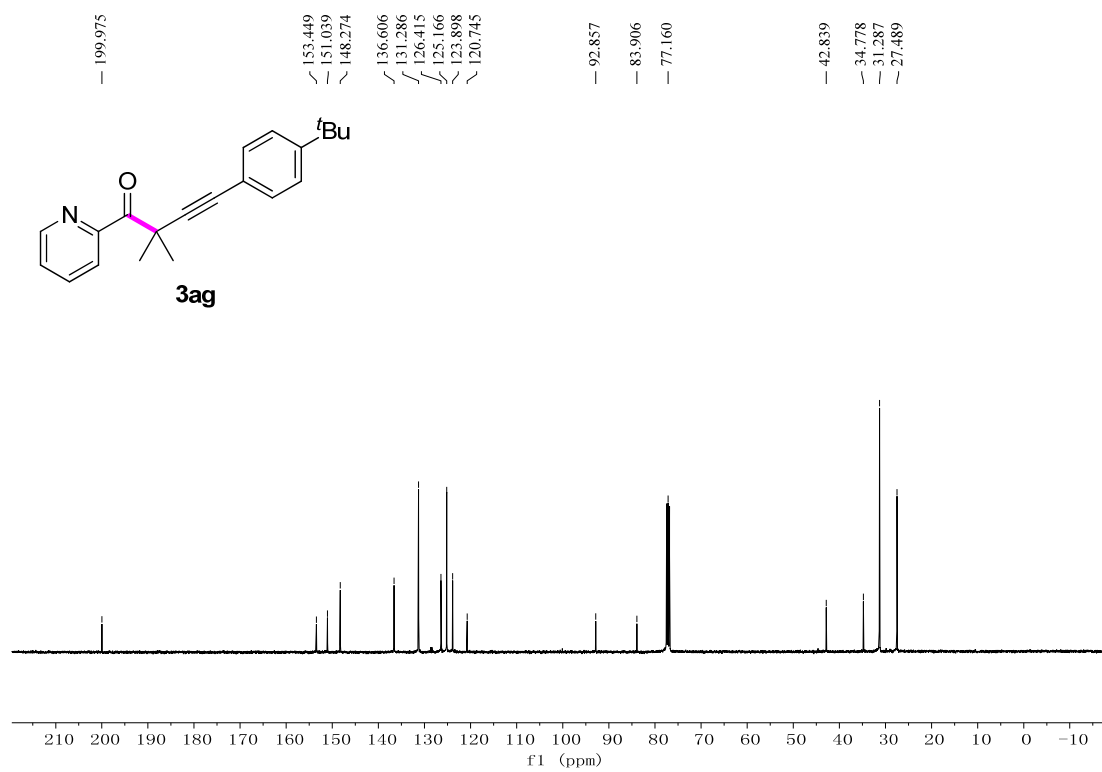

### <sup>1</sup>H NMR spectrum of compound **3ah**

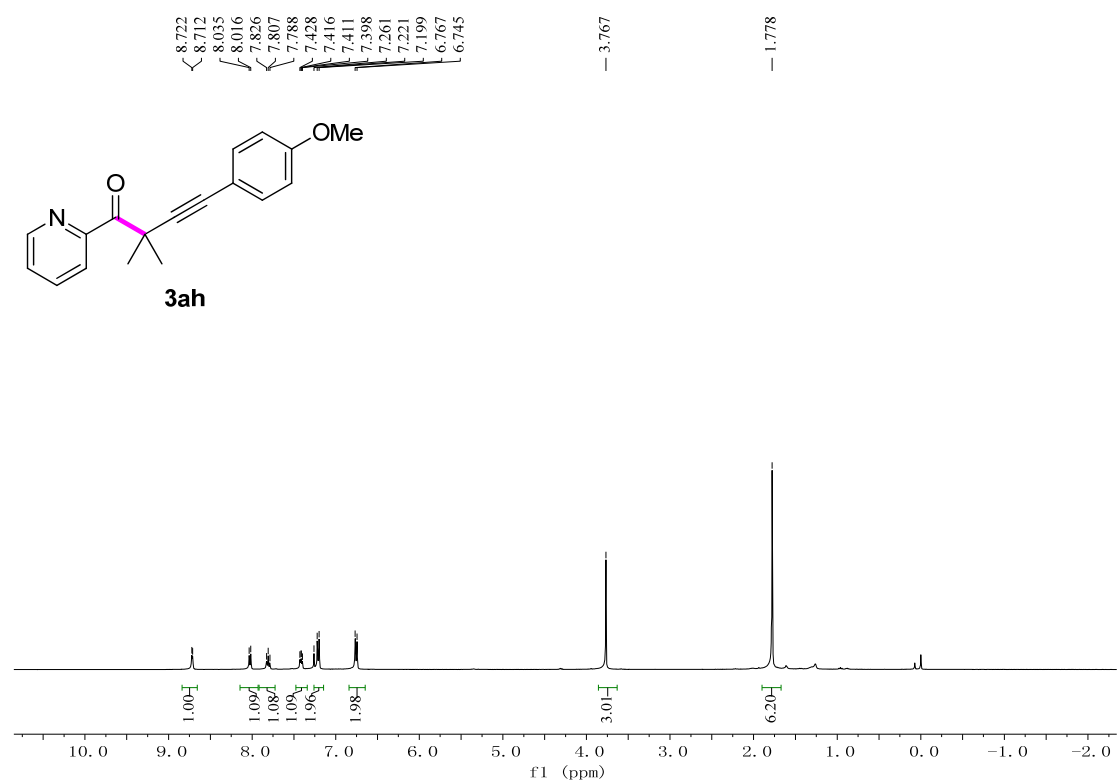

### <sup>13</sup>C NMR spectrum of compound **3ah**

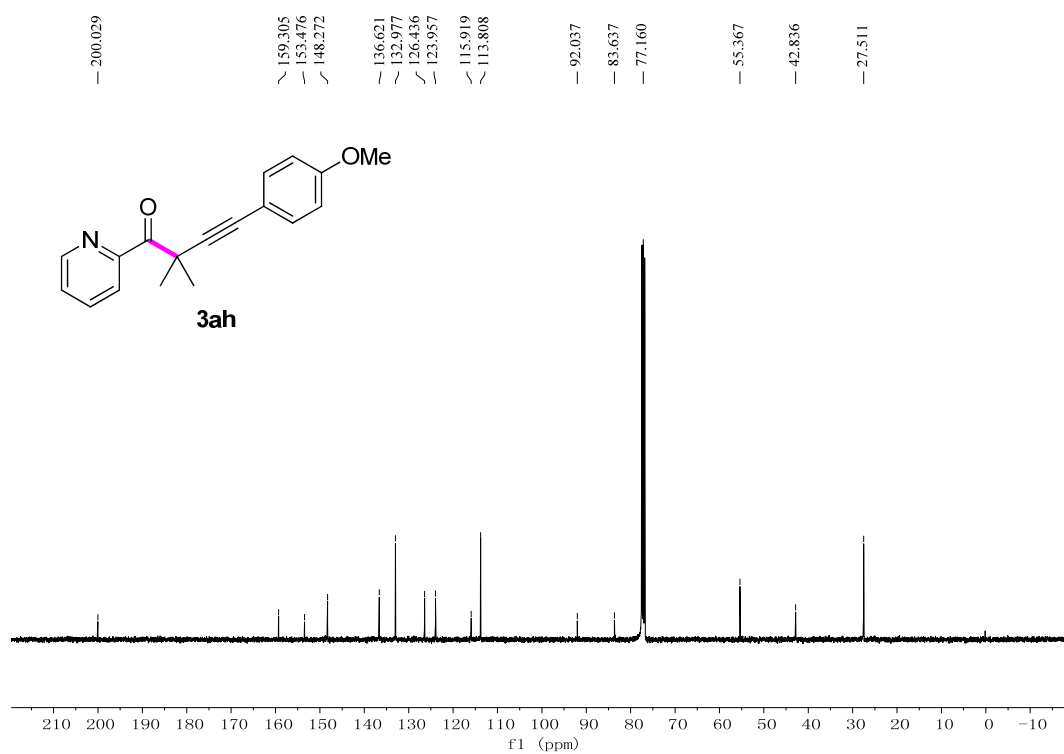

### $^1\text{H}$ NMR spectrum of compound **3ai**

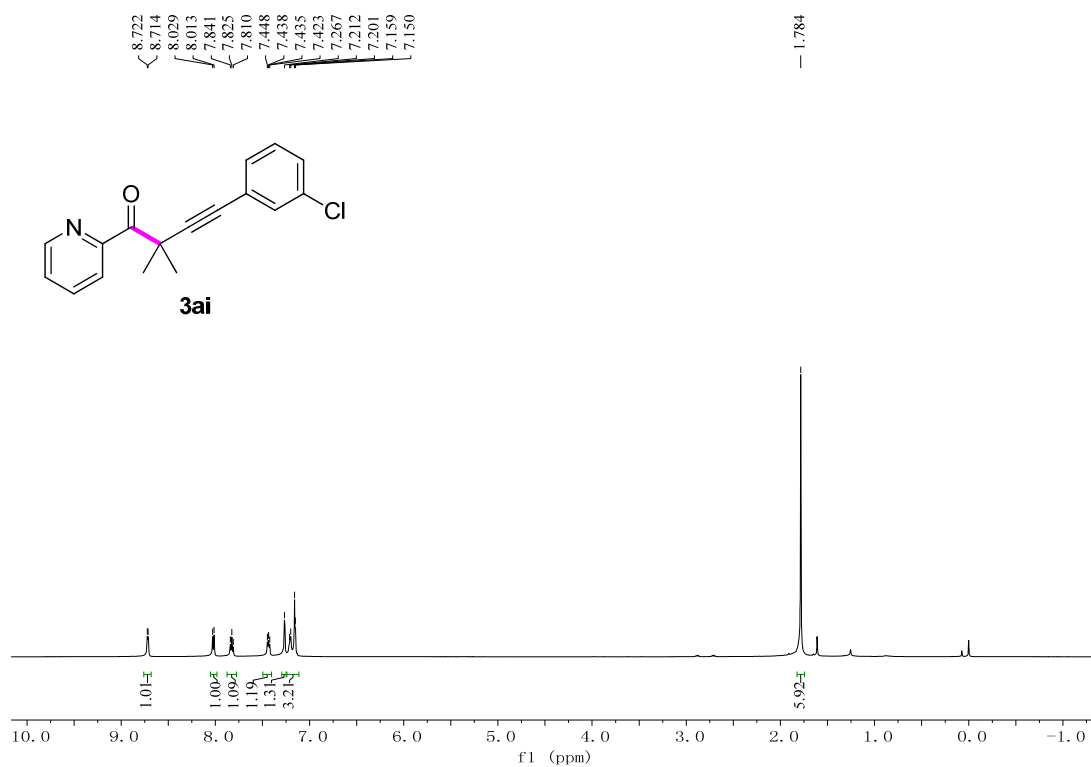

### $^{13}\text{C}$ NMR spectrum of compound **3ai**

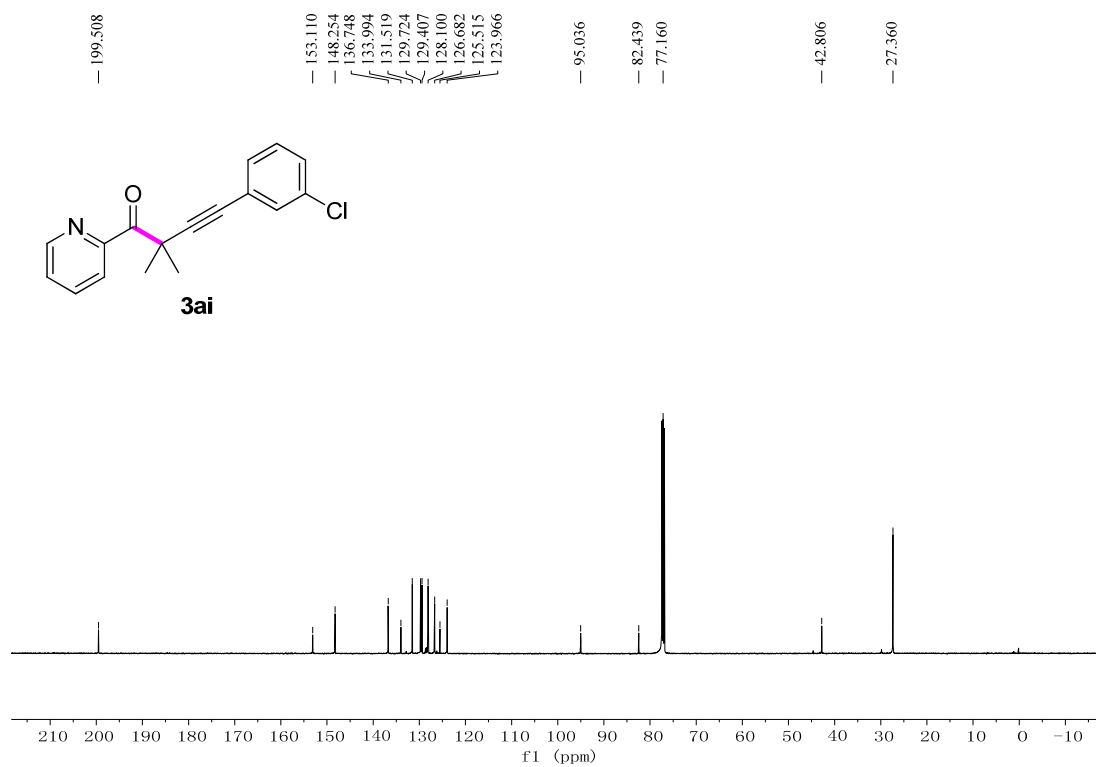

### $^1\text{H}$ NMR spectrum of compound **3aj**

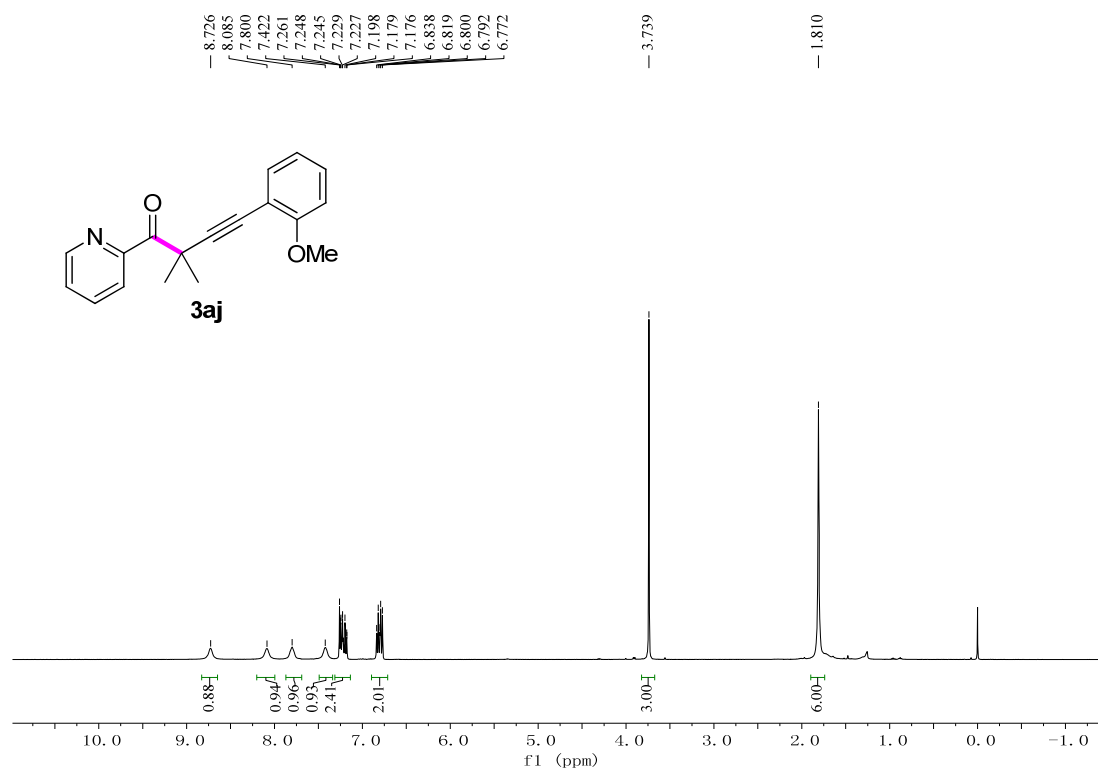

### $^{13}\text{C}$ NMR spectrum of compound **3aj**

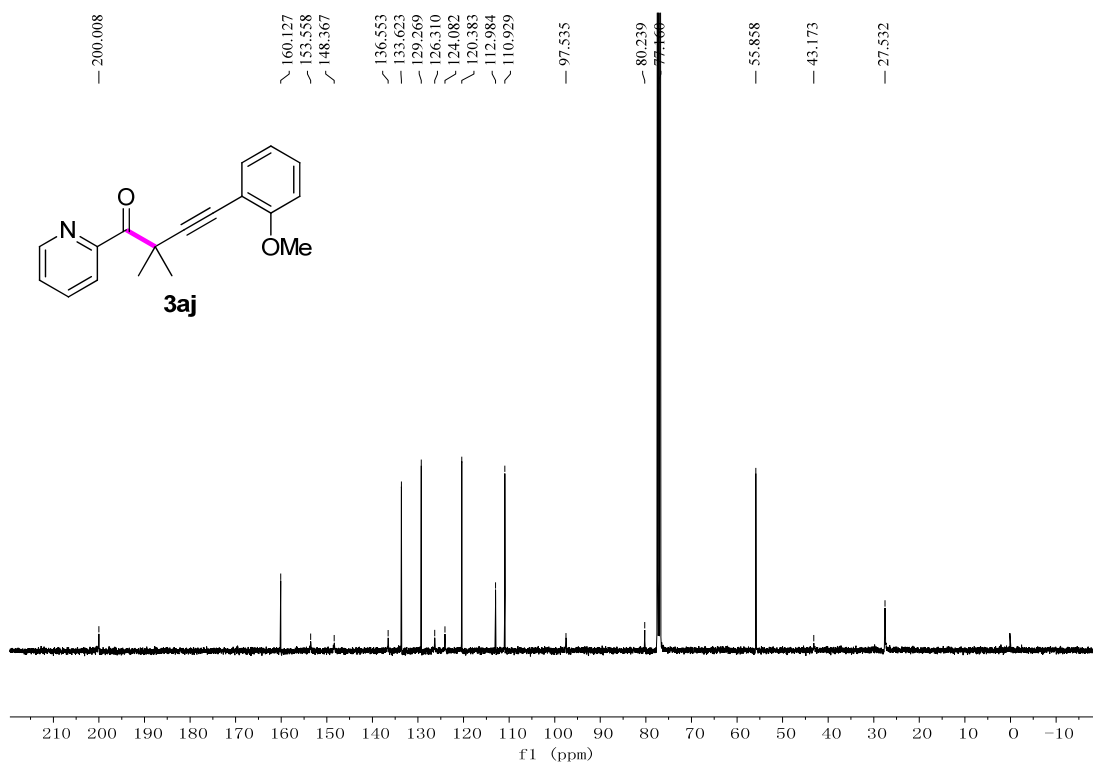



### <sup>1</sup>H NMR spectrum of compound **3ak**

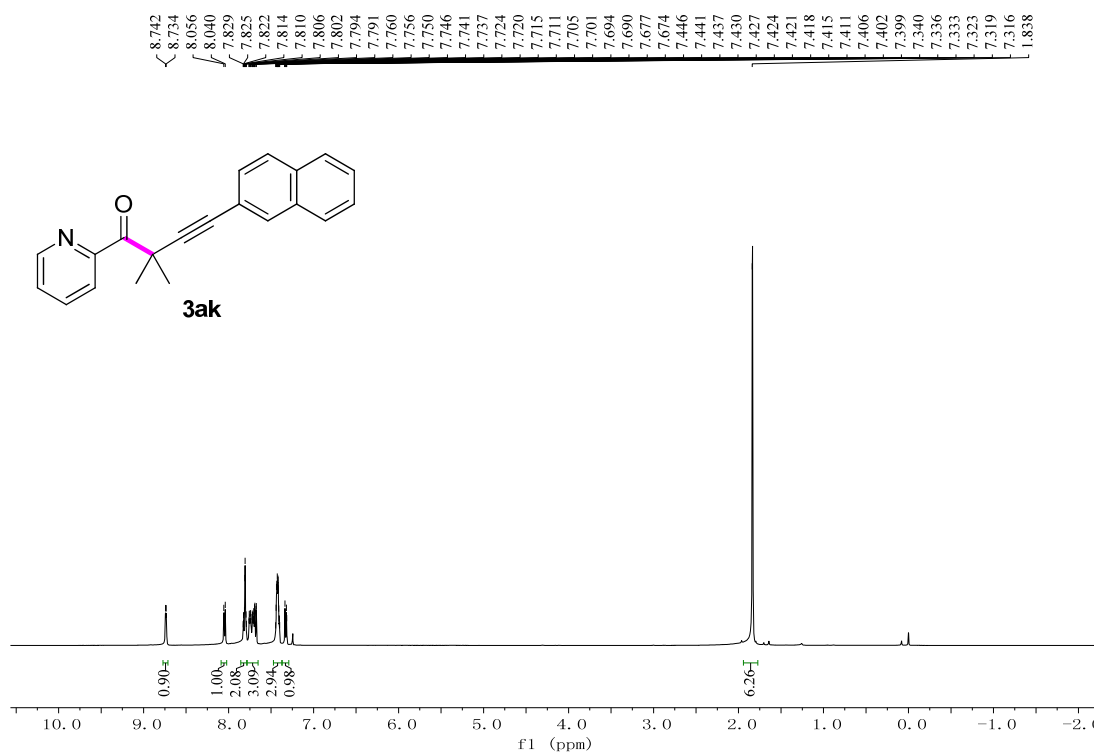

### <sup>13</sup>C NMR spectrum of compound **3ak**

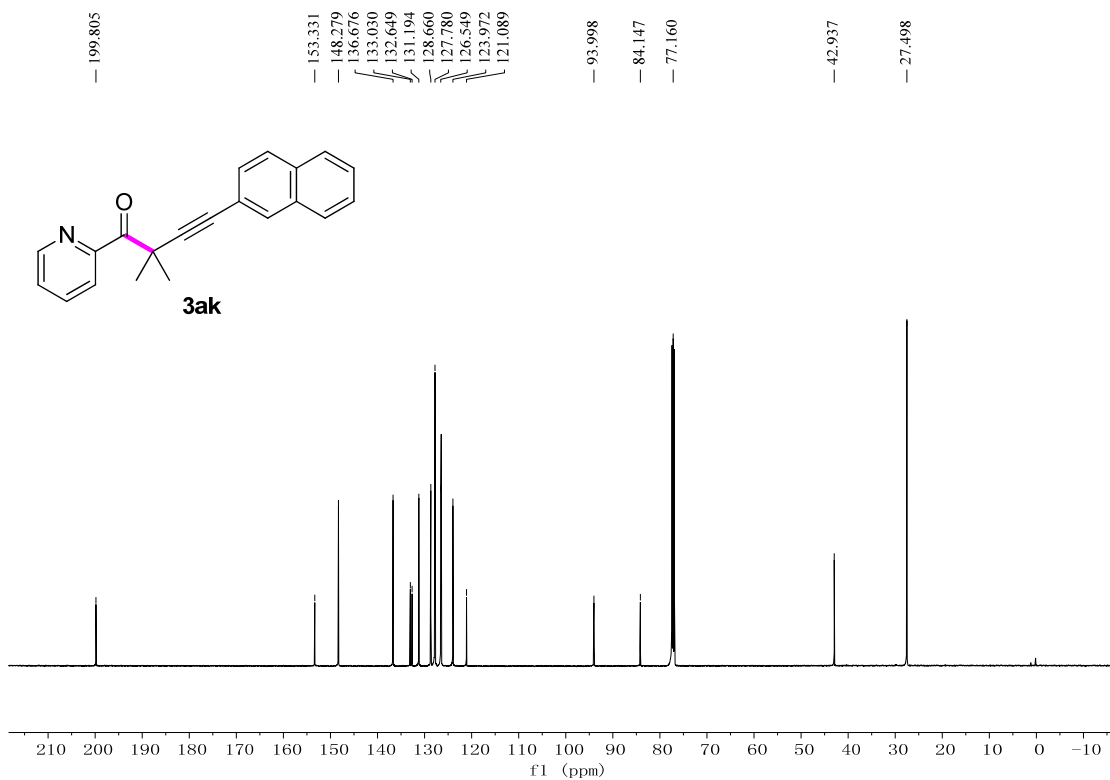

### <sup>1</sup>H NMR spectrum of compound **3al**

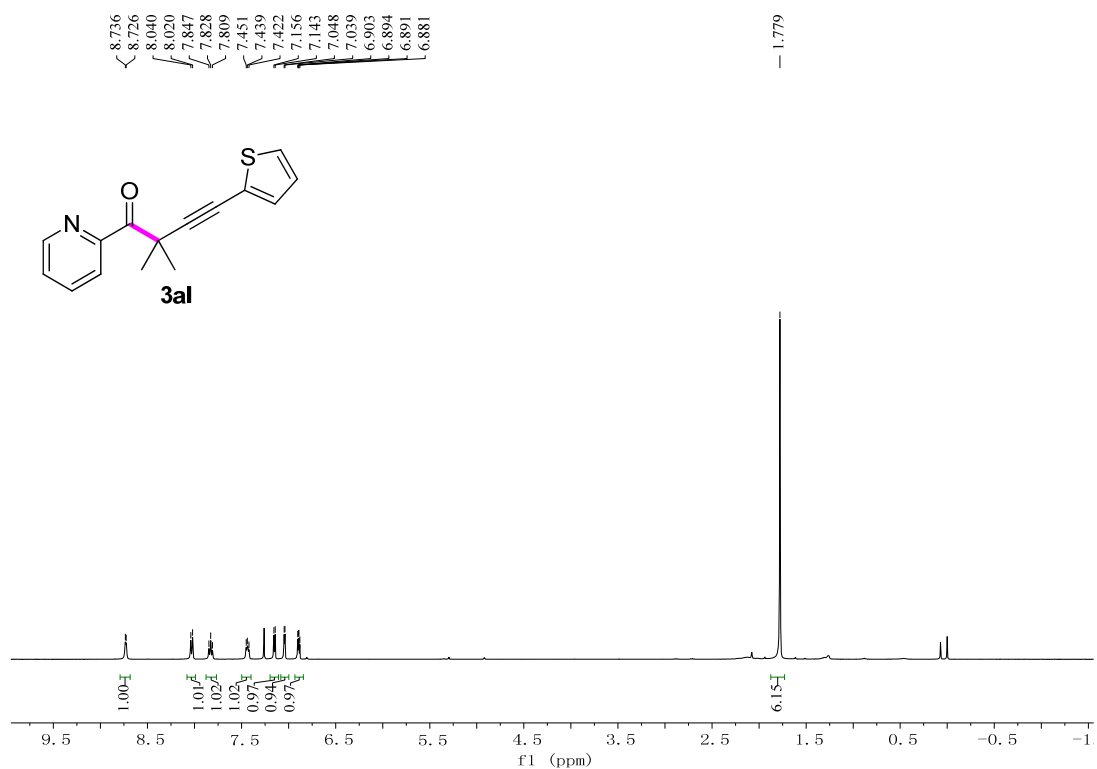

### <sup>13</sup>C NMR spectrum of compound **3al**

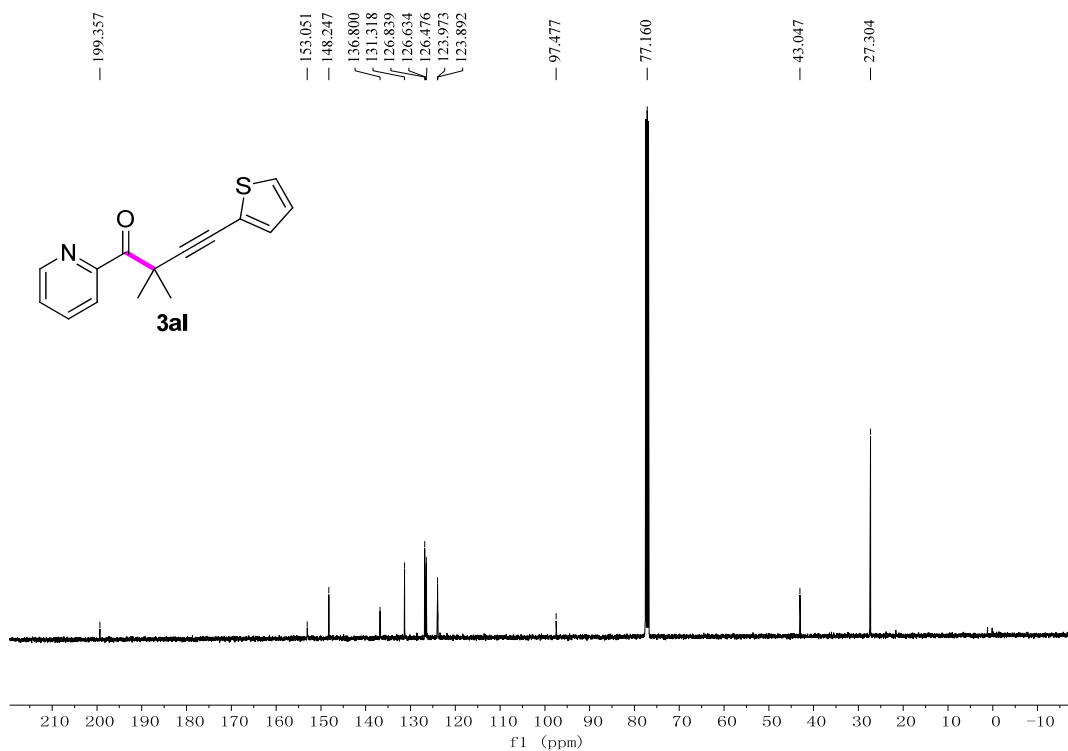

### <sup>1</sup>H NMR spectrum of compound **3am**

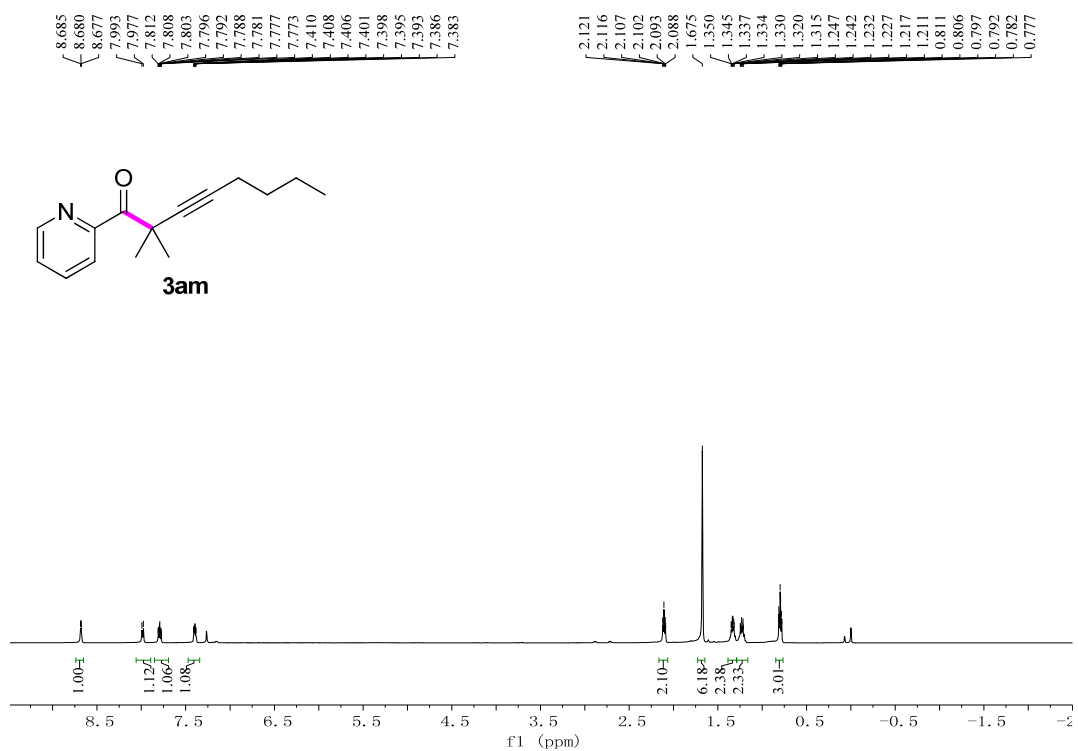

### <sup>13</sup>C NMR spectrum of compound **3am**

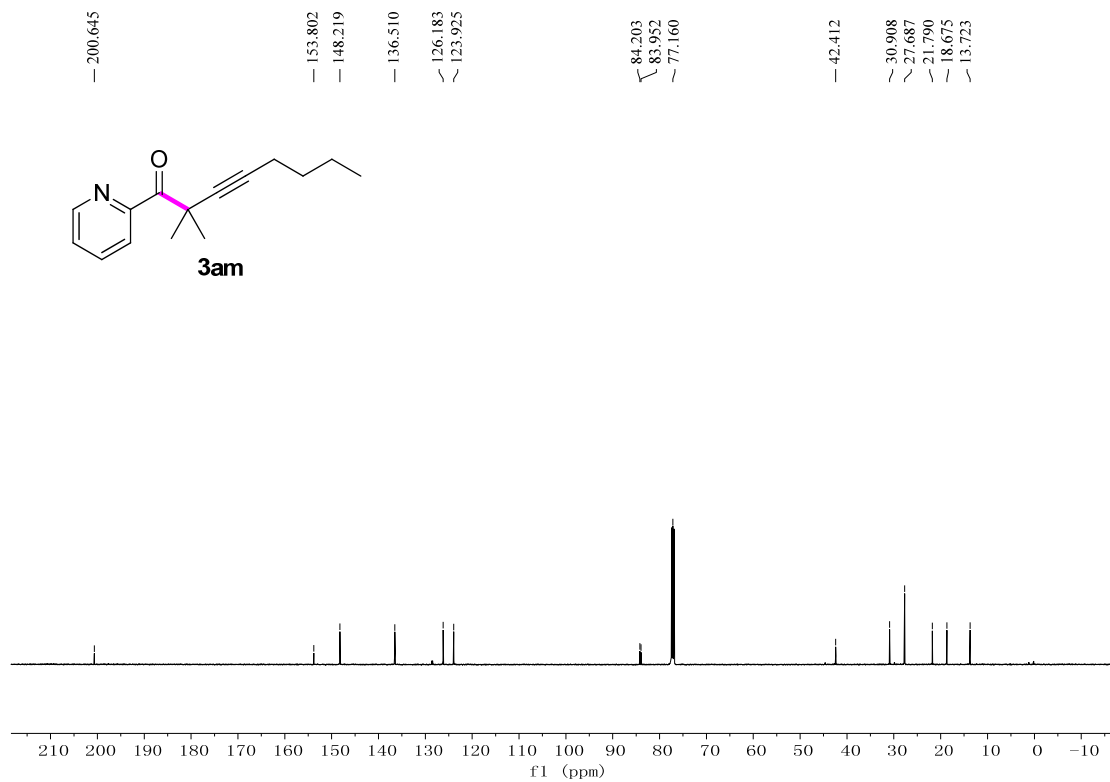

### <sup>1</sup>H NMR spectrum of compound **3hk**

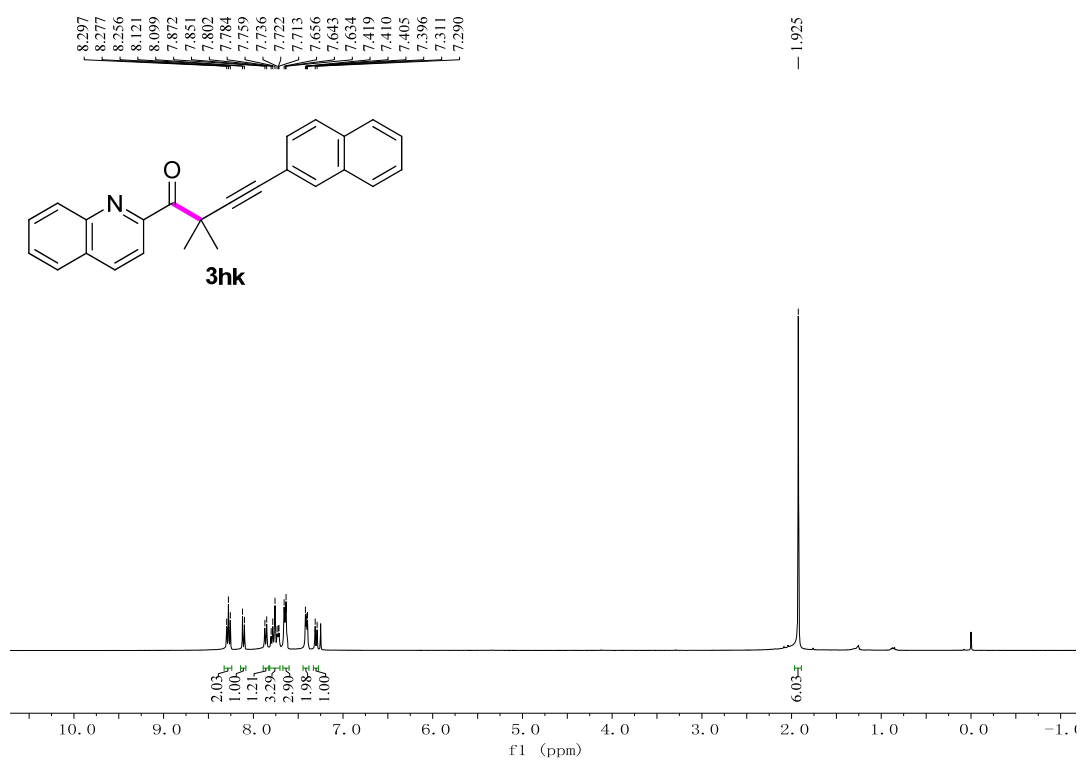

### <sup>13</sup>C NMR spectrum of compound **3hk**

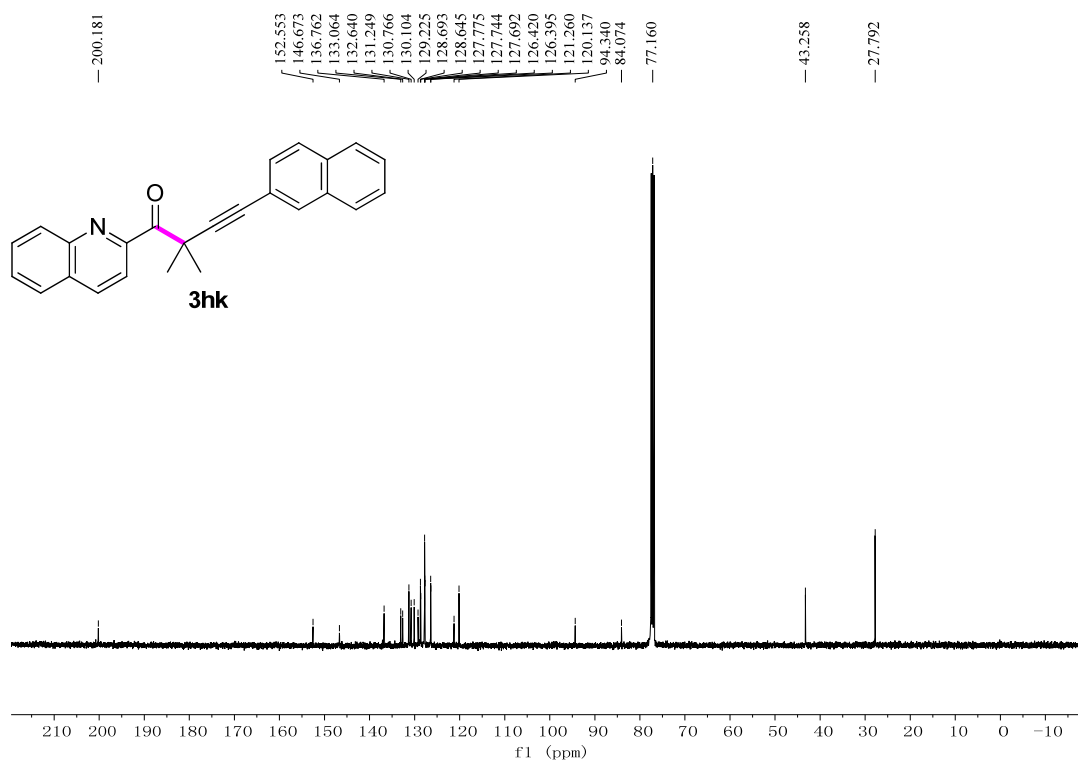

Supplement: d1cc01311d1.pdf [file d1cc01311d1.pdf]
